1                   **New insights into the ORF2 capsid protein, a key player of**  
2                                           **the hepatitis E virus lifecycle**

3  
4 Maliki Ankavay<sup>a</sup>, Claire Montpellier<sup>a</sup>, Ibrahim M. Sayed<sup>b,§</sup>, Jean-Michel Saliou<sup>a</sup>, Czeslaw  
5 Wychowski<sup>a</sup>, Laure Saas<sup>a</sup>, Sandrine Duvet<sup>d</sup>, Cécile-Marie Aliouat-Denis<sup>a</sup>, Rayan Farhat<sup>a</sup>,  
6 Valentin de Masson d'Autume<sup>a</sup>, Philip Meuleman<sup>b</sup>, Jean Dubuisson<sup>a</sup> and Laurence  
7 Cocquerel<sup>a,\*</sup>

8  
9 <sup>a</sup> University of Lille, CNRS, INSERM, CHU Lille, Pasteur Institute of Lille, U1019-UMR  
10 8204-CIIL- Center for Infection and Immunity of Lille, F-59000 Lille, France

11 <sup>b</sup> Laboratory of Liver Infectious Diseases, Department of Clinical Chemistry, Microbiology  
12 and Immunology, Ghent University, Ghent, Belgium.

13 <sup>c</sup> Microbiology and Immunology Department, Faculty of Medicine, Assiut University, Assiut,  
14 Egypt.

15 <sup>d</sup> Univ. Lille, CNRS, UMR 8576 - UGSF - Unité de Glycobiologie Structurale et  
16 Fonctionnelle, F-59000 Lille, France

17

18 Running Head: HEV ORF2 capsid protein

19

20 <sup>§</sup>: Present address: Department of Pathology, School of Medicine, University of California,  
21 San Diego, La Jolla, California, USA.

22 C. M. and I.M.S. contributed equally to this work

23 <sup>\*</sup> Address correspondence to Dr Laurence Cocquerel, Molecular & Cellular Virology, CIIL,  
24 CNRS-UMR8204 & Inserm-U1019, Institut Pasteur de Lille, Bâtiment IBL, 1 rue du Pr.

25 Calmette, CS50447, 59019 Lille cedex, France, [laurence.cocquerel@ibl.cnrs.fr](mailto:laurence.cocquerel@ibl.cnrs.fr)

## 26 **Abstract**

27           Hepatitis E Virus (HEV) genome encodes three proteins including the ORF2 protein  
28 that is the viral capsid protein. Recently, we developed an efficient HEV cell culture system  
29 and demonstrated that this virus produces three different forms of its capsid protein: (i) the  
30 ORF2i form (infectious/intracellular) which is the form associated with the infectious  
31 particles, (ii) the ORF2g (glycosylated ORF2) and ORF2c (cleaved ORF2) forms that are  
32 massively secreted glycoproteins not associated with infectious particles, but are the major  
33 antigens present in HEV-infected patient sera. The ORF2 protein sequence contains three  
34 highly conserved potential N-glycosylation sites (N1, N2 and N3). Although ORF2 protein is  
35 the most characterized viral protein, its glycosylation status and the biological relevance of  
36 this post-translational modification is still unclear. In the present study, we constructed and  
37 extensively characterized a series of ORF2 mutants in which the three N-glycosylation sites  
38 were mutated individually or in combination. We demonstrated that the ORF2g/c protein is  
39 N-glycosylated on N1 and N3 sites but not on the N2 site. We showed that N-glycosylation of  
40 ORF2 protein does not play any role in replication and assembly of infectious HEV particles.  
41 We found that glycosylated ORF2g/c forms are very stable proteins which are targeted by  
42 patient antibodies. During our study, we also demonstrated that the ORF2i protein is  
43 translocated into the nucleus of infected cells. In conclusion, our study led to new insights  
44 into the molecular mechanisms of ORF2 expression.

45

## 46 **Importance**

47           Hepatitis E virus (HEV) infection is the most common cause of acute viral hepatitis  
48 worldwide. This infection can become chronic in immunosuppressed patients and cause death  
49 in some patients. In our study, we focused on ORF2 viral capsid protein for which we  
50 recently identified glycosylated and non-glycosylated forms. The non-glycosylated form,  
51 named ORF2i, is the form associated with the infectious particles. The glycosylated forms,  
52 named ORF2g and ORF2c, are the major antigens present in HEV-infected patient sera. Here,  
53 we identified which sites on ORF2g/c proteins are N-glycosylated. We showed that N-  
54 glycosylation of ORF2 proteins is not involved in the biogenesis of infectious HEV particles.  
55 We found that ORF2g/c proteins are very stable and are targeted by patient antibodies. We  
56 also demonstrated that the ORF2i protein is translocated into the nucleus of infected cells.  
57 Thus, our study led to new important insights into the molecular mechanisms of ORF2  
58 expression.

## 59 **Introduction**

60           Hepatitis E virus (HEV) is the most common cause of acute viral hepatitis worldwide.  
61 This virus infects approximately 20 million people every year and is responsible for 3.4  
62 million symptomatic cases and 70,000 deaths, mainly in regions of the world with low  
63 sanitary conditions (1). Although HEV infection is usually asymptomatic and self-resolving,  
64 severe forms in pregnant women (2) and chronic infections in immunocompromised patients  
65 (3) have been described. In addition, HEV infection has been associated with a broad range of  
66 extrahepatic manifestations, including renal and neurological manifestations (3). HEV strains  
67 infecting humans have been classified into 4 main distinct genotypes (gt) belonging to a  
68 single serotype. Gt1 and gt2 exclusively infect humans, are spread mainly through  
69 contaminated drinking water and represent main causes of waterborne outbreaks of hepatitis  
70 in developing countries. In contrast, gt3 and gt4 are zoonotic and mainly infect mammals.  
71 Their main reservoirs are pigs and game (4). The major transmission routes of gt3 and gt4 are  
72 direct contact with infected animals, consumption of contaminated food and transfusion of  
73 blood products. In industrialized countries, the most common genotype causing HEV  
74 infection is gt3. Importantly, due to the evolution toward chronicity in immunocompromised  
75 infected patients, HEV transmission through blood transfusion, resistance of some infected  
76 patients to ribavirin and complications in patients with preexisting liver disease, HEV  
77 infection is now considered as an emerging problem in industrialized countries (5).

78           HEV is a quasi-enveloped virus (6-8) containing a linear, single-stranded, positive-  
79 sense RNA genome that contains three open reading frames (ORFs), namely, ORF1, ORF2  
80 and ORF3 (9). ORF1 encodes a non-structural polyprotein (ORF1 protein) that is essential for  
81 viral replication (10). It includes methyltransferase (Met), papain-like cysteine protease  
82 (PCP), RNA helicase (Hel) and RNA-dependent RNA polymerase (RdRp) domains (reviewed  
83 in (1)). ORF2 encodes the ORF2 viral capsid protein and ORF3 encodes a small

84 multifunctional phosphoprotein that is involved in virion morphogenesis and egress (reviewed  
85 in (11)).

86         The ORF2 protein sequence contains 660 amino acids, a signal peptide sequence at its  
87 N-terminus and three highly conserved potential N-glycosylation sites represented by the  
88 sequon Asn-X-Ser/Thr (N-X-S/T) (12-14). The ORF2 protein has been largely studied and is  
89 the most characterized HEV viral protein. However, whether using various heterologous  
90 expression systems (14-17) or infectious systems (8, 13), the glycosylation status of ORF2  
91 and the biological relevance of this post-translational modification was still controversial until  
92 recently. Indeed, by combining the highly replicative and cell culture-selected gt3 p6 strain  
93 (18) and a highly transfectable subclone of PLC/PRF/5 cells (PLC3 cells), we recently  
94 developed an efficient HEV cell culture system and demonstrated for the first time that,  
95 during its lifecycle, HEV produces 3 forms of the ORF2 capsid protein (**Figure 1A**):  
96 infectious/intracellular ORF2 (ORF2i), glycosylated ORF2 (ORF2g), and cleaved ORF2  
97 (ORF2c) (19). We identified the precise sequence of the ORF2i and ORF2g proteins. The  
98 ORF2i protein is the form that is associated with infectious particles. The ORF2i protein is  
99 not glycosylated and is likely not translocated into the endoplasmic reticulum (ER) lumen and  
100 stays in the cytosolic compartment. In contrast, ORF2g and ORF2c proteins are secreted in  
101 large amounts in cell culture and infected patient sera, sialylated, N- and O-glycosylated but  
102 are not associated with infectious virions. The identification of these 3 forms of ORF2 led us  
103 to suggest the existence of two production pathways for the HEV capsid protein: (i) a major  
104 non-productive pathway in which ORF2 proteins are addressed to the secretion route where  
105 they are glycosylated, matured and quickly secreted. (ii) a productive pathway in which  
106 cytosolic ORF2 proteins are delivered to the virion assembly sites (19). Importantly, ORF2g  
107 and ORF2c are the most abundant antigens detected in sera from patients (19). Whether

108 ORF2g and ORF2c proteins play a specific role in the HEV lifecycle or have functions in host  
109 immune response needs to be elucidated.

110 In the present study, we took advantage of our HEV cell culture system, in which  
111 ORF2 proteins are robustly expressed, to analyze the significance of N-glycosylation of the  
112 ORF2 protein in the HEV lifecycle. Using site-directed mutagenesis of the full-length  
113 infectious p6 clone, we constructed a series of ORF2 mutants in which the three potential N-  
114 glycosylation sites (<sup>137</sup>NLS, N1; <sup>310</sup>NLT, N2; <sup>562</sup>NTT, N3) were mutated individually or in  
115 combination. We performed an extensive characterization of these mutants by analyzing their  
116 subcellular localization, expression, oligomerization, stability and recognition by antibodies.  
117 We also studied the impact of mutations on assembly, density and infectivity of HEV  
118 particles. In addition to analyzing the glycosylation status of ORF2 protein and the biological  
119 relevance of this modification in the HEV life cycle, we obtained new insights into the  
120 molecular mechanisms of ORF2 expression.

121

## 122 **Results**

### 123 **Generation of HEV p6 genomes expressing mutations of ORF2 N-glycosylation sites.**

124 The ORF2 protein sequence displays a signal peptide sequence at its N-terminus and  
125 three potential N-glycosylation sites, <sup>137</sup>NLS (N1), <sup>310</sup>NLT (N2), and <sup>562</sup>NTT (N3) (**Figure**  
126 **1B**). Previously, we demonstrated that the first amino acids (aa) of ORF2i and ORF2g  
127 proteins are Leu<sup>14</sup> and Ser<sup>34</sup>, respectively (19). Here, by using the same mass spectrometry  
128 approach, we found that the first aa of ORF2c protein corresponds to Ser<sup>102</sup> (**Figure 1B** and  
129 **Figure 2**), indicating that ORF2c protein is likely a cleavage product of the ORF2g protein.

130 Using site-directed mutagenesis of the full-length infectious p6 clone, we constructed  
131 a series of ORF2 mutants in which N1, N2 and N3 sites were mutated individually (N1, N2  
132 and N3 mutants) or in combination (Gly(-) and Gly(+) mutants) (**Figure 1B**). For each single  
133 mutant, three substitutions of the N-X-S/T sequon were generated: N-to-A (S1), S/T-to-A  
134 (S2) and S-to-T/T-to-S (S3). S1 and S2 substitutions were made to prevent N-glycosylation  
135 (Red), whereas S3 substitution does not affect N-glycan addition (Green). A fourth  
136 substitution (S4) was done for the N2 site in which a Proline (P) residue downstream of the  
137 sequon was replaced by an Alanine (<sup>313</sup>P-to-A). In Gly(-) and Gly(+) mutants, two  
138 combinations of mutations affecting (N1S2/N3S1) or not (N1S3/N3S3) the N-glycan addition  
139 on N1 and N3 glycosylation sites were introduced, respectively (**Figure 1B**). Mutants  
140 expressing mutations that theoretically abolish N-glycosylation are in Red. Mutants  
141 expressing mutations that theoretically do not disturb or improve N-glycosylation (N2S4) are  
142 in Green. Capped RNAs transcripts of wild type (wt) and mutant (mut) HEV genomes were  
143 generated and delivered into PLC3 cells by electroporation.

144

145

146

## 147 **Expression and subcellular localization of mutant ORF2 proteins**

148 We first evaluated the expression and subcellular localization of mutant ORF2  
149 proteins by indirect immunofluorescence. PLC3 cells electroporated with wild type and  
150 mutants of HEV-p6 RNAs (wt and mt PLC3/HEV-p6 cells) were fixed at 3 days post-  
151 electroporation (d.p.e.) and processed for ORF2 staining. For all constructs, over 90% of cells  
152 were ORF2-positive indicating that robust replication and expression of viral genome  
153 occurred in wt and mt PLC3/HEV-p6 cells (data not shown). As shown in **Figure 3A**, the wt  
154 ORF2 protein displayed mostly a cytoplasmic localization but also a nuclear localization, as  
155 recently described (20). Although mutant ORF2 proteins were globally expressed as the wt  
156 ORF2 protein, N1 mutants showed a slightly more perinuclear localization (**Figure 3A**), N2  
157 mutants showed a concentrated staining in a spot close to the nucleus (**Figure 3B**) whereas  
158 N3 mutants showed a subcellular localization similar to that of wt ORF2 proteins (**Figure**  
159 **3C**). Double labeling with anti-ORF2 and ER-specific anti-calnexin MAbs or with anti-ORF2  
160 and Golgi-specific anti-GM130 MAbs failed to reveal co-localization of ORF2 proteins with  
161 these compartment markers (data not shown), as previously observed for the gt1 ORF2  
162 protein (13). Nuclear localization of wt and mt ORF2 proteins was further characterized, as  
163 described below.

164 Altogether, our results show that all the mutants of N-glycosylation sites of ORF2  
165 protein are well expressed in PLC3 cells. Also, the wt ORF2 protein shows a cytoplasmic and  
166 nuclear localization (**Figure 3**).

167

## 168 **The ORF2 protein is N-glycosylated on N1 and N3 sites but not on the N2 site**

169 To characterize the impact of N-glycosylation site mutations on the ORF2 protein  
170 profile and oligomerization, ORF2 protein expression in supernatants and lysates of wt and  
171 mt PLC3/HEV-p6 cells was characterized by western blotting (WB). As shown in **Figure 4A**,



172 a single band was detected in all cell lysates, which corresponds to ORF2i as previously  
173 described (19), immunofluorescence stainings observed in Figure 3 thus corresponded mainly  
174 to the subcellular localization of ORF2i proteins. We observed no shift of migration between  
175 wt and mutant proteins, even for the mutants carrying mutations that inhibit N-glycosylation.  
176 These results confirm that the ORF2i protein is not N-glycosylated, as previously described  
177 (19). In the supernatants of transfected cells, the three forms of the ORF2 protein (ORF2g,  
178 ORF2i and ORF2c) were identified (**Figure 4B**). Interestingly, we observed a shift of  
179 migration of ORF2g and ORF2c proteins for the mutants that inhibit N-glycosylation on N1  
180 or N3 sites or both (N1S1, N1S2, N3S1, N3S2 and Gly(-)), as compared to wt protein (**Figure**  
181 **4B** and **Figure 4D**). In contrast, no shift of migration was observed for proteins carrying  
182 mutations that do not affect glycosylation of N1 and N3 sites (N1S3, N3S3 and Gly(+)).  
183 These results indicate that both N1 and N3 sites of the ORF2 protein are likely occupied by  
184 N-glycans. Analyses of N2S1, N2S2 and N2S3 mutants showed that their ORF2g and ORF2c  
185 proteins behaved similarly whatever the introduced mutation (affecting or not glycosylation)  
186 prevented us from drawing conclusions about the N-glycosylation status of the N2 site.  
187 However, since it has been demonstrated that a proline residue right downstream of the N-X-  
188 S/T sequon constitutes an unfavorable context for N-linked glycan modification (21), we  
189 generated an additional mutant of the N2 site in which we replaced the Proline<sup>313</sup> by an  
190 Alanine residue (N2S4) (**Figure 1**). Interestingly, N2S4 ORF2g and ORF2c proteins  
191 displayed a higher apparent molecular weight than the wt forms (**Figure 4B**), indicating that  
192 the N2S4 mutation likely leads to the addition of a supplementary N-glycan on ORF2  
193 proteins. Together, these results indicate that the N2 site is likely not N-glycosylated in the  
194 context of wt ORF2 proteins.

195 To further characterize which site of ORF2 protein is truly N-glycosylated,  
196 representative mutants were selected (N1S1, N2S1, N2S4, N3S1 and Gly(-)) and further

197 characterized. Supernatants and lysates of wt and mt PLC3/HEV-p6 cells were denatured and  
198 digested with Peptide-N-Glycosidase F (PNGaseF), a glycosidase that cleaves between the  
199 innermost N-acetyl glucosamine and asparagine residues of N-glycoproteins. The proteins  
200 were resolved by SDS-PAGE and ORF2 proteins were detected by WB. As shown in **Figure**  
201 **4E**, wt and mt ORF2i proteins expressed from cell lysates were resistant to glycosidase  
202 digestion, strengthening the fact that ORF2i protein in cell lysates is not N-glycosylated. In  
203 contrast, we observed a shift of migration between untreated (-) and treated (+) condition for  
204 the secreted wt and mutants N1S1, N2S1, N2S4 and N3S1 (**Figure 4F**). Importantly, no shift  
205 was observed for the Gly(-) double mutant carrying mutations that inhibit N-glycosylation on  
206 N1 and N3 sites, confirming that the N2 site is not occupied by N-glycans. In addition for the  
207 N2S4 mutant, we observed a higher migration shift between untreated (-) and treated (+)  
208 ORF2g and ORF2c proteins, as compared to wt (**Figure 4F**).

209 To further confirm which sites of N-glycosylation are occupied by glycans on ORF2  
210 protein, we next performed mass spectrometry analyses. ORF2g/ORF2c proteins  
211 immunoprecipitated with an anti-ORF2 antibody (4B2) were treated or left untreated with  
212 PNGaseF. Proteins were resolved by SDS-PAGE and Colloidal blue-stained bands  
213 corresponding to ORF2g and ORF2c proteins in WB (data not shown) were digested in-gel  
214 with trypsin (Tryp) or AspN and then analyzed by nano scale liquid chromatography coupled  
215 to tandem mass spectrometry. Detected peptides were compared to the theoretical peptide  
216 sequences of non N-glycosylated or PNGaseF-deglycosylated ORF2 protein digested with  
217 Tryp or AspN. As shown in **Table 1**, when ORF2g/c proteins were not treated with PNGaseF,  
218 no peptides covering N1 and N3 sites were detected after digestion with Tryp or AspN. In  
219 contrast, upon treatment with PNGaseF, peptides covering N1 and N3 sites were detected  
220 after digestion with Tryp or AspN, indicating that N1 and N3 sites are most likely occupied  
221 by N-glycans (modifying the mass of peptides covering them and therefore their detection in

222 the absence of PNGaseF treatment). Interestingly, peptides covering the N2 site were detected  
223 in both treated and untreated samples digested with Tryp or AspN, indicating that the  
224 probability that the site N2 is occupied by N-glycans is very low (**Table 1**).

225 Taken together, our results demonstrate that the ORF2 protein is N-glycosylated on  
226 N1 (<sup>137</sup>NLS) and N3 (<sup>562</sup>NTT) sites but not on the N2 (<sup>310</sup>NLT) site.

227

### 228 **Impact of mutations of ORF2 N-glycosylation sites on the oligomerization and stability** 229 **of the ORF2 capsid protein**

230 The impact of mutations of ORF2 N-glycosylation sites on the oligomerization of the  
231 ORF2 capsid protein was next assessed by analyzing supernatants and lysates of wt and mt  
232 PLC3/HEV-p6 cells prepared in non-reducing conditions. Oligomers of ORF2i and  
233 glycosylated ORF2 proteins were clearly detected (**Figure 4C** and **Figure 4D**, asterisks).  
234 Taking into account the differences in individual protein expression levels (**Figure 4A**), no  
235 significant differences in the oligomerization levels of ORF2 proteins was observed between  
236 wt and mutants.

237 We next analyzed the significance of ORF2 N-glycosylation for protein stability. For  
238 this purpose, supernatants of wt and mt PLC3/HEV-p6 cells were kept during 0, 10 and 20  
239 days at 37°C and analyzed by WB (**Figure 4G**). Surprisingly, even after 20 days of  
240 incubation, ORF2g and ORF2c proteins were still readily detected, indicating that these  
241 proteins are very stable and poorly degraded in culture medium. Quantification by  
242 densitometry of ORF2 levels in wt and N2S4 supernatants, showed that only 30-35% of  
243 proteins were degraded after 20 days. In contrast, 60% of Gly(-) and Gly(+) proteins were  
244 degraded after 20 days, indicating that these mutants are less stable in culture medium but in a  
245 glycosylation-independent manner.

246

247 **Mutations of N-glycosylation sites do not modify ORF2 antibody recognition.**

248 To determine the impact of mutations of N-glycosylation sites on the anti-ORF2  
249 antibody recognition, ORF2 proteins in cell lysates and supernatants of wt and mt  
250 PLC3/HEV-p6 cells were immunoprecipitated with either a linear (1E6) or two  
251 conformational (4B2 and 2E2, (22)) anti-ORF2 MAbs, and analyzed by WB (**Figure 5**).  
252 Although some detection differences were observed for several mutants, likely reflecting  
253 some differences in individual protein expression levels (**Figure 5A**, input), mutant ORF2i  
254 proteins were recognized by the three antibodies (**Figure 5A**). The supernatants were  
255 standardized according to the ORF2i expression levels and then immunoprecipitated with  
256 1E6, 4B2 and 2E2 MAbs. As shown in **Figure 5B**, ORF2g and ORF2c proteins were equally  
257 immunoprecipitated by the three antibodies. We also quantified levels of secreted ORF2  
258 proteins with the Wantai HEV-antigen ELISA<sup>Plus</sup> assay that has been recently marketed for  
259 HEV diagnosis and that works with monoclonal and polyclonal antibodies (Wantai Biological  
260 Pharmacy Enterprise). As shown in **Figure 5C**, no significant differences were observed in  
261 protein detection between wt and mt ORF2 proteins.

262 We next sought to determine whether mutations of N-glycosylation sites affect  
263 recognition by patient antibodies. For this purpose, we used a serum from a patient who has  
264 cleared his HEV infection (serum S30) and a serum from a non-infected patient (serum N6).  
265 Sera were incubated with protein A-agarose beads and then with ORF2g/ORF2c proteins or  
266 PBS (CTL) (**Figure 5D**). ORF2g/ORF2c proteins were isolated on iodixanol cushions, as  
267 previously described (19). ORF2g and ORF2c proteins were specifically immunoprecipitated  
268 by immunoglobulins raised in the S30 patient serum whereas no proteins were precipitated by  
269 the N6 negative serum. As shown in **Figure 5E**, wt and mt ORF2g/ORF2c proteins were all  
270 recognized by antibodies from the S30 patient serum.

271 Taken together, these results demonstrate that mutations of ORF2 N-glycosylation  
272 sites do not modify the recognition of ORF2 protein by linear, conformational and patient  
273 antibodies. Thus, these mutations induce no major changes in ORF2 protein folding and N-  
274 glycosylation of ORF2 protein does not play a major role in antibody recognition.  
275 Importantly, our results show that ORF2g and ORF2c proteins are highly recognized by  
276 patient antibodies.

277

### 278 **The ORF2 protein translocates into the nucleus of infected cells independently of its N-** 279 **glycosylation status**

280 Since a recent study (20) and our confocal microscopy analyses (**Figure 3**) suggest  
281 that, in addition to its cytoplasmic localization, the ORF2 protein might also translocate into  
282 the nucleus of infected cells, we next further characterized this process by WB and  
283 immunofluorescence. We prepared cytoplasmic and nuclear extracts from wt and mt  
284 PLC3/HEV-p6 cells. Proteins were resolved by SDS-PAGE and the ORF2 protein was  
285 detected by WB. Cytoplasmic-specific anti-tubulin and nuclear envelope-specific anti-Lamin-  
286 B1 antibodies were used to control the quality of extractions. As expected, the ORF2i protein  
287 was detected in cytoplasmic extracts of wt and mt PLC3/HEV-p6 cells (**Figure 6A**).  
288 Interestingly, wt and mutant ORF2 proteins were also detected in nuclear extracts (**Figure**  
289 **6B**). We named this protein ORF2ni for nuclear ORF2i. Among mutants of N-glycosylation,  
290 some differences in the ORF2ni detection were observed (**Figure 6B**). N1S3, N2S2, N2S3,  
291 Gly(-) and Gly(+) mutants showed reduced ORF2ni amounts whereas nuclear translocation  
292 was likely not affected for the other mutants, as compared to the wt protein. In order to  
293 quantify the effect of mutations of N-glycosylation sites on nuclear translocation, nuclear  
294 fluorescence intensity of ORF2 protein was measured on 50 cells for each mutant with the  
295 ImageJ software. As shown in **Figure 6C**, a significant reduction of nuclear translocation was

296 observed for all mutants excepted for the N2S1 mutant and the three mutants of the N3 site.  
297 However, we did not observe any correlation between the status of N-glycosylation of ORF2  
298 and its nuclear localization.

299 Altogether, our results demonstrate that, during HEV lifecycle, the ORF2 capsid  
300 protein is translocated into the nucleus of infected cells. This nuclear localization is not  
301 closely related to the ORF2 protein N-glycosylation.

302

### 303 **Impact of mutations of ORF2 protein N-glycosylation sites on viral assembly and** 304 **infectivity**

305 Next, we analyzed the impact of mutations of ORF2 protein N-glycosylation sites on  
306 viral RNA production and infectivity. Supernatants of wt and mt PLC3/HEV-p6 cells were  
307 collected at 2, 6 and 10 d.p.e. and then processed for RNA level quantification by RT-qPCR  
308 (**Figure 7A**) and determination of extracellular infectious titers (**Figure 7B**). It has to be  
309 noted that, in order to specifically quantify capsid-protected RNA genomes, extractions and  
310 quantifications of extracellular RNA were performed after treatment of supernatants with  
311 RNase. Quantification of extracellular RNA genomes and calculation of fold increase  
312 between 2, 6 and 10 d.p.e., which are in line with HEV RNA replication and secretion of  
313 capsid-protected RNA genomes, showed that mutants of the N2 site led to a reduction of  
314 RNA replication and/or secretion of capsid-protected RNA genomes (**Figure 7A**), whereas  
315 extracellular RNA levels of N1, N3 and double mutants were similar to wt genome. To  
316 determine viral infectivity, Huh-7.5 cells were infected with serial dilutions of supernatants  
317 and processed for ORF2 staining at 3 d.p.i. Viral titers were determined by quantifying focus  
318 forming units (FFU/mL) (**Figure 7B**). As expected, supernatants of N2 mutants were not  
319 infectious. Supernatants of N1 and double mutants displayed reduced infectivity. Although  
320 the N3S1 mutant was slightly less infectious, other mutants of the N3 site displayed infectious

321 titers similar to wt strain. These results indicate that mutations of the N1 site inhibit  
322 infectivity of viral particles whereas mutations of the N3 site have no major impact on the  
323 biogenesis of infectious HEV particles.

324 In order to precisely define the impact of mutations on HEV RNA replication, we  
325 quantified the levels of intracellular viral RNA genomes. Although several significant  
326 differences were observed among mutants, intracellular RNA replication was globally not  
327 affected by the mutations of ORF2 protein N-glycosylation sites (**Figure 7C**). Finally, we  
328 determined the infectivity of intracellular particles produced in wt and mt PLC3/HEV-p6 cells  
329 (**Figure 7D**). N2S3, N2S4 and Gly(-) PLC3/HEV-p6 cells did not produce any infectious  
330 particles, indicating that these mutations are lethal for assembly of infectious HEV particles.  
331 N1 mutants, N2S1, N2S2 and Gly(+) mutants displayed highly reduced intracellular titers,  
332 indicating that these mutations affect assembly and infectivity of HEV particles. As for  
333 extracellular titers, the N3S1 mutant was slightly less infectious whereas N3S2 and N3S3  
334 mutants displayed intracellular titers similar to wt strain.

335 Taken together, our results show that (i) mutations of N1 glycosylation site inhibit  
336 infectivity of HEV particles, (ii) mutations of N2 glycosylation site inhibit assembly of HEV  
337 particles and (iii) mutations of N3 glycosylation site have little or no effect on assembly of  
338 infectious HEV particles. Importantly, whatever the introduced mutation within the same site  
339 (affecting or not N-glycosylation) the same phenotype was observed indicating that N-  
340 glycosylation of ORF2 protein does not play any role in assembly of infectious HEV  
341 particles.

342

### 343 **Impact of mutations of ORF2 protein N-glycosylation sites on particle density**

344 To further characterize our mutants, we produced large amounts of infectious  
345 supernatants by culturing wt and mt PLC3/HEV-p6 cells during 12 days. Supernatants were

346 pooled, concentrated, and fractionated on an iodixanol gradient. ORF2 protein expression,  
347 density and RNA levels were determined for each fraction (**Figure 8 A-G**). As previously,  
348 only some representative mutants were analyzed (N1S1, N2S1, N2S4, N3S1, Gly(-) and  
349 Gly(+)). ORF2g and ORF2c proteins were highly enriched in fractions 4 and 5 whereas the  
350 ORF2i protein was mainly observed in fraction 5 or 6 of wt or mutants that assembled  
351 particles (N1S1, N3S1, Gly(-) and Gly(+)). In accordance with our previous results (**Figure**  
352 **7**), N2S1 and N2S4 mutants displayed no ORF2i and no extracellular RNAs confirming that  
353 the mutations of N2 glycosylation site inhibit assembly of HEV particles. As described  
354 previously (19), only one major peak of RNA was detected in fraction 6, with a density of  
355 1.11 g/mL, for wt and N3S1 gradients. In contrast, N1S1, Gly(-) and Gly(+) displayed a RNA  
356 peak in fraction 4 or 5 with a density of 1.10 g/mL, indicating that non-infectious mutants  
357 have a slightly lower density, as compared to infectious particles.  
358



## 359 **Discussion**

360 We recently demonstrated that during its infectious cycle, HEV produces three  
361 different forms of its ORF2 capsid protein (19). The ORF2i form (infectious / intracellular) is  
362 the form associated with the infectious particles. This protein of about 80 kDa is neither N-  
363 glycosylated or nor O-glycosylated. The ORF2g (glycosylated) and ORF2c (cleaved) forms,  
364 are proteins that are massively secreted but are not associated with infectious material. These  
365 two forms are approximately 90 kDa and 75 kDa, respectively. They are N-glycosylated, O-  
366 glycosylated and sialylated. In the present study, we identified the precise sequence of the  
367 ORF2c form that is likely a cleavage product of the ORF2g protein. Importantly, ORF2g/c  
368 proteins do not form particulate material but they are the major viral antigens present in the  
369 serum of HEV-infected patients. HEV may produce ORF2g/c proteins as immunological bait.  
370 Since these proteins are likely extremely stable in infected patients (23), they might represent  
371 markers of the evolution of hepatitis E infection. It is therefore essential to determine the  
372 molecular and cellular mechanisms leading to the biogenesis of the different forms of ORF2  
373 protein. In the present study, we analyzed the N-glycosylation status of ORF2 proteins and  
374 the biological relevance of this post-translational modification in the HEV life cycle. We also  
375 obtained new insights into the molecular mechanisms of ORF2 expression.

376 The ORF2 protein has been largely studied and is the most characterized HEV viral  
377 protein. Notably, its glycosylation status has been analyzed by several laboratories but no  
378 clear evidence was depicted about the biological relevance of this post-translational  
379 modification in the HEV life cycle. As early as 1996, by using SV40-based expression  
380 vectors in COS-1 cells, Jameel and collaborators described the gt1 ORF2 protein as an 88kDa  
381 glycoprotein which is expressed intracellularly as well as on cell surface and has the potential  
382 to form non covalent homodimers (15). Later on, using the same expression system, they  
383 demonstrated that Asn-310 (N2 site) is the major but not the only site of N-glycan addition

384 (14). In 2008, Graff et al. analyzed the impact of mutations within highly conserved  
385 glycosylation sites of the gt1 Sar55 infectious full-length genome (13). They observed no  
386 difference in electrophoretic migration rates of wildtype glycosylated and mutant  
387 nonglycosylated ORF2 proteins in cell lysates, suggesting that ORF2 protein accumulating  
388 within transfected S10-3 cells is not glycosylated. They also demonstrated that mutation of  
389 the first 2 glycosylation sites prevented virion assembly and mutation of the third site did not  
390 affect particle formation and RNA encapsidation but the particles were not infectious.  
391 However, conservative mutations that did not affect glycosylation also prevented infection,  
392 indicating that mutations of N-glycosylation sites were lethal because they perturbed protein  
393 structure rather than because they eliminated glycosylation (13). In our study, by using site-  
394 directed mutagenesis of the three N-glycosylation sites, PNGaseF treatment and mass  
395 spectrometry analyses of ORF2 protein expressed from our efficient gt3 p6 full-length strain-  
396 based HEV cell culture system, we robustly demonstrated that the ORF2 protein is N-  
397 glycosylated on N1 (<sup>137</sup>NLS) and N3 (<sup>562</sup>NTT) sites but not on the N2 (<sup>310</sup>NLT) site. The  
398 absence of N-glycan addition on N2 site is likely due to the presence of a Proline<sup>313</sup> residue  
399 immediately downstream of the <sup>310</sup>NLT sequon, which has a deleterious effect on N-glycan  
400 addition (24). In accordance with this claim, we showed that the Proline<sup>313</sup> to Alanine<sup>313</sup>  
401 substitution (N2S4 mutant) induced additional ORF2 N-glycosylation. It has to be noted that  
402 alignment of 293 sequences from genotype 1 to genotype 4 HEV strains showed that the  
403 Proline<sup>313</sup> is highly conserved (25), suggesting that the absence of N-glycans on ORF2 N2 site  
404 is likely a conserved process among HEV genotypes. We have been able to robustly analyze  
405 the glycosylation status of ORF2 thanks to the high expression levels of this protein in our  
406 replicative system. It would be now also interesting to develop a similar cell culture system  
407 for the gt1 HEV in order to robustly analyzed the glycosylation status of the gt1 ORF2  
408 protein.

409 We performed an extensive characterization of ORF2 mutants in which the three  
410 potential N-glycosylation sites were mutated individually or in combination. Whatever the  
411 introduced mutations, we observed no significant differences in expression, secretion,  
412 oligomerization, stability and recognition by antibodies of the secreted ORF2g and ORF2c  
413 proteins. However, we showed that ORF2g and ORF2c proteins were very stable and poorly  
414 degraded when kept in culture medium at 37°C, which is consistent with previous  
415 observations showing that ORF2 protein remained detectable for more than 100 days after  
416 HEV RNA clearance in ribavirin-treated patients with chronic HEV infection (23).  
417 Importantly, we showed that ORF2g and ORF2c proteins were the main antigens recognized  
418 by antibodies from a patient who had cleared his HEV infection (serum S30), indicating that  
419 these glycosylated ORF2 forms are the main targets of the humoral response during HEV  
420 infection.

421 The level of ORF2i protein expression and its recognition by MAbs were not affected  
422 by mutations of N-glycosylation sites, which is in line with the fact that this protein is not  
423 glycosylated. However, during our study, we demonstrated that intracellular ORF2 proteins  
424 displayed both cytoplasmic and nuclear localization, as recently observed by  
425 immunohistochemistry of liver biopsy from patients with hepatitis E (20). By performing  
426 differential extractions and detection by western blotting, we demonstrated that the ORF2i  
427 protein localized in the nuclear fraction of HEV producing cells. We named this fraction of  
428 ORF2i, ORF2ni for nuclear ORF2i protein. Characterization of N-glycosylation mutants  
429 showed that nuclear localization of ORF2ni is not closely related to the ORF2 protein N-  
430 glycosylation. Altogether, our results demonstrate that, during HEV life cycle, the ORF2  
431 capsid protein is translocated into the nucleus of infected cells to presumably control certain  
432 cellular functions to promote viral replication and/or alter the antiviral response of the

433 infected cell. Further studies are now necessary to decipher the mechanisms and significance  
434 of ORF2 nuclear translocation in the HEV life cycle.

435         We analyzed the impact of mutations of ORF2 protein N-glycosylation sites on viral  
436 RNA production and particle infectivity. None of the mutations had an effect on viral  
437 replication. On the other hand, mutations of N1 glycosylation site inhibited infectivity of  
438 HEV particles, mutations of N2 glycosylation site abolished assembly of HEV particles and  
439 mutations of N3 glycosylation site had little or no effect on assembly of infectious HEV  
440 particles. Importantly, as observed by Graff et al. (13), whatever the introduced mutation,  
441 affecting or not N-glycosylation, the same effects were observed, indicating that N-  
442 glycosylation of ORF2 protein does not play any role in assembly of infectious HEV  
443 particles. Mutations likely induce modifications in ORF2i protein domains involved in  
444 particle assembly. Interestingly, we observed that non-infectious particles were characterized  
445 by a slightly lower density, as compared to infectious particles, which might reflect subtle  
446 differences in ORF2 assembly leading to non-infectious particles. It has been suggested that  
447 cytoplasmic localization of the ORF2 protein would depend on its ability to be  
448 retrotranslocated from the ER by a glycosylation-dependent process (26). In that case, a non-  
449 glycosylated form of ORF2, such as our Gly(-) mutant, will not generate any cytoplasmic  
450 ORF2i protein. However, the Gly(-) mutant produced ORF2i protein levels similar to that of  
451 the wt ORF2, indicating that ORF2i proteins are likely not generated from a glycosylation-  
452 dependent retrotranslocation process.

453         Since the ORF2g/c proteins might interfere with the capacity of HEV virions to infect  
454 target cells (19), we also performed inhibition assays of HEV infection in the presence of  
455 mutant ORF2g/c proteins. However, we could not make any correlation between  
456 glycosylation status and inhibition levels (data not shown).

457           Altogether, our results demonstrate that ORF2 N-glycosylation is not essential in the  
458 HEV life cycle. However, the ORF2g/c proteins are also modified by O-glycosylation and  
459 sialic acids, as recently demonstrated (19, 27). Further studies are now necessary to identify  
460 the significance of these modifications in the functionality of ORF2g/c proteins in HEV  
461 infection. Anyway, our findings strengthen our hypothesis that the HEV life cycle or at least  
462 the production of viral particles might be tightly regulated by the differential addressing of the  
463 ORF2 capsid protein. Indeed, the identification of the 3 forms of ORF2 led us to suggest the  
464 existence of two production pathways for the HEV capsid protein: (i) a major non-productive  
465 pathway in which ORF2 proteins are addressed to the secretion route where they are  
466 glycosylated, matured and quickly secreted. (ii) a productive pathway in which cytosolic  
467 ORF2 proteins are delivered to the virion assembly sites (19). The identification of the  
468 nuclear ORF2ni protein suggests now that a fine balance of ORF2 addressing likely occurs  
469 between cytosolic, nuclear and reticular pathways.

470

471

## 472 **Materials and Methods**

### 473 **Chemicals and cell cultures.**

474 PLC3 (19) and Huh-7.5 (28) cells were grown in Dulbecco's modified Eagle's medium  
475 (DMEM) supplemented with 10% inactivated fetal calf serum and 1% of Non-Essential  
476 amino acids (Life Technologies) at 37°C. Transfected PLC3 cells were maintained at 32°C in  
477 a medium containing DMEM/M199 (1v:1v), 1mg/ml of lipid-rich albumin (Albumax I™),  
478 1% of Non-Essential amino acids and 1% of pyruvate sodium (Life Technologies).

479

### 480 **Plasmids and transfection.**

481 The plasmid pBlueScript SK(+) carrying the DNA of the full length genome of adapted gt3  
482 Kernow C-1 strain, (HEV-p6, GenBank accession number JQ679013, kindly provided by S.U  
483 Emerson) was used as a template (18). The mutants of the ORF2 N-glycosylation sites were  
484 generated by site directed mutagenesis. Individual mutations were introduced by sequential  
485 PCR steps, as described previously (29), using the Q5 High-Fidelity 2X Master Mix (New  
486 England Biolabs, NEB), then digestions with restriction enzymes and ligation were  
487 performed. The double mutants of N-glycosylation sites were generated by exchanging the  
488 mutant fragments from single mutants using specific restriction sites. All the mutations were  
489 verified by DNA sequencing.

490 To prepare genomic HEV RNAs (capped RNA), the wild type (wt) and mutant (mt)  
491 pBlueScript SK(+) HEV-p6 plasmids were linearized at their 3' end with the MluI restriction  
492 enzyme (NEB) and transcribed with the mMESSAGING mMACHINE® kit (Ambion). Capped  
493 RNAs were next delivered to PLC3 cells by electroporation using a Gene Pulser Xcell™  
494 apparatus (Bio-Rad) (19).

495

496

497 **Patient samples.**

498 Patient samples were collected in France between 2014 and 2016. Samples were obtained  
499 only *via* standard viral diagnostics following a physician's order (no supplemental or  
500 modified sampling). Data were analyzed anonymously. The French Public Health Law (CSP  
501 Art L 1121-1.1) does not require written informed consent from patients for such a protocol.

502

503 **Kinetic experiments and virus production.**

504 PLC3 cells were electroporated with wild type and mutant HEV-p6 RNAs (20µg/3x10<sup>6</sup> cells).  
505 For kinetics experiments, supernatants were harvested 2, 6 and 10 days post-electroporation  
506 (d.p.e) and then used for viral titers, RNAs quantification and WB analysis. Transfected cells  
507 (6x10<sup>6</sup>) were lysed 10 d.p.e. in buffer containing 10mM TrisHCl (pH 7), 150mM NaCl, 2mM  
508 EDTA, 0.5% Triton X-100, 1mM PMSF and protease inhibitor cocktail (Complete; Roche).  
509 Supernatants and cell lysates were stored at -80°C until analysis.

510

511 **Antibodies**

512 Three mouse anti-HEV ORF2 monoclonal antibodies (MAb) were used: (i) the linear 1E6  
513 anti-ORF2 MAb (antibody registry #AB-827236, Millipore), (ii) the conformational 4B2 anti-  
514 ORF2 MAb (antibody registry #AB-571018, Millipore) and (iii) the conformational 2E2 anti-  
515 ORF2 MAb (antibody registry #AB-571017, Millipore). Mouse anti-β tubulin (antibody  
516 registry #AB-609915) was from Sigma and rabbit anti-Lamin B1 (antibody registry #AB-  
517 443298) antibody was from Abcam. Secondary antibodies were purchased from Jackson  
518 ImmunoResearch.

519

520 **Indirect immunofluorescence**

521 PLC3 cells electroporated with wildtype and mutants of HEV-p6 RNAs (wt and mt

522 PLC3/HEV-p6 cells) were grown on coverslips in 24-well plates and fixed 3 d.p.e. with 3%  
523 of Paraformaldehyde (PFA). After 20 minutes (min), cells were washed twice with  
524 phosphate-buffered saline (PBS) and permeabilized for 5 min with cold methanol and then  
525 with 0.5% Triton X-100 for 30 min. Cells were incubated in PBS containing 10% goat serum  
526 for 30 min at room temperature (RT) and stained with the 1E6 anti-ORF2 MAb for 30 min at  
527 RT followed by a Cy3-conjugated goat anti-mouse antibody for 20 min at RT. The nuclei  
528 were stained with DAPI (4',6-diamidino-2-phenylindole). After 2 washes with PBS,  
529 coverslips were mounted with Mowiol 4-88 (Calbiochem) on glass slides and analyzed with a  
530 LSM 800 confocal laser-scanning microscope (Zeiss) using a x40/1.4 numerical aperture oil  
531 immersion lens.

532

### 533 **Quantification of the ORF2 protein nuclear fluorescence**

534 The method was adapted from McCloy et al. (30). Briefly, the ORF2 protein nuclear  
535 fluorescence was determined using ImageJ software (version 1.51, NIH). The regions of  
536 interest (ROI) were drawn around the nuclei on the immunofluorescence image from  
537 PLC3/HEV-p6 wt and mt using imageJ ROI tools. Area, integrated density and mean gray  
538 values were measured. Then, corrected total cell fluorescence (CTCF) was calculated by the  
539 following formula:  $CTCF = \text{integrated density} - (\text{area of selected electroporated cells} \times \text{mean}$   
540  $\text{of background fluorescence around the cells})$ . The exact nuclear fluorescence was = CTCF-  
541 the mean of the integrated density of non-infected cells.

542

### 543 **Western blotting analyses**

544 Western blotting analyses were performed as described previously (31). Briefly, supernatants  
545 and lysates of wt and mt PLC3/HEV-p6 cells were heated for 20 min at 80°C in the presence  
546 of Laemmli buffer (reducing or non-reducing). Samples were then separated by SDS-PAGE



547 and transferred onto nitrocellulose membranes (Hybond-ECL, Amersham). The targeted  
548 proteins were detected with specific antibodies and corresponding peroxidase-conjugated  
549 secondary antibodies. The detection of proteins was done by chemiluminescence analysis  
550 (ECL, Amersham).

551

### 552 **PNGase-F treatment**

553 Supernatants and lysates of wt and mt PLC3/HEV-p6 cells were denatured for 10min at  
554 95°C in glycoprotein denaturing buffer (NEB). Digestions with Peptide-N-Glycosidase F  
555 (PNGaseF, NEB) were carried out for 4h at 37°C in the presence of 1% NP40 and the buffer  
556 provided by the manufacturer (NEB). Samples prepared in the same conditions but without  
557 glycosidase were used as controls.

558

### 559 **Nuclear and cytoplasmic extractions**

560 Confluent T75 flasks of wt and mt PLC3/HEV-p6 cells ( $6 \times 10^6$  cells) were harvested 12  
561 d.p.e. with trypsin-EDTA. Cells were centrifuged at 4000rpm for 5 min and washed thrice  
562 with PBS. Nuclear and cytoplasmic proteins were extracted using the NE-PER Nuclear and  
563 Cytoplasmic extraction Kit (Thermo scientific) following the manufacturer's  
564 recommendations.

565

### 566 **Immunoprecipitations**

567 Polyclonal rabbit anti-mouse antibody (DAKO) was bound to protein A-agarose beads and  
568 incubated overnight with mouse anti-ORF2 MAb (1E6 or 4B2). Beads were washed thrice  
569 with PBS and then incubated for 2 hours at room temperature with supernatants or lysates of  
570 wt and mt PLC3/HEV-p6 cells. Beads were washed six times with PBS 0.5% NP40 and then

571 heated at 80°C for 20 min in Laemmli buffer. Proteins were separated by SDS-PAGE and  
572 ORF2 proteins were detected by WB using the 1E6 MAb.

573

#### 574 **Quantification of the ORF2 protein levels by ELISA.**

575 The supernatant of wt and mt PLC3/HEV-p6 cells and non-transfected PLC3 cells (CTL)  
576 were diluted in PBS (1:250 and 1:500). HEV ORF2 Ag levels were measured with the Wantai  
577 HEV-Ag ELISA<sup>Plus</sup> kit (Wantai Biological Pharmacy Enterprise), as recommended by the  
578 manufacturer.

579

#### 580 **Intracellular viral particles and RNAs**

581 The procedure was adapted from Emerson et al. (32). Briefly, confluent T25 flasks of wt and  
582 mt PLC3/HEV-p6 cells were trypsinized and cells were centrifuged for 10 min at 1500 rpm.  
583 Cells were washed thrice with PBS. Intracellular viral particles were extracted by  
584 resuspending cells in 1ml of sterile MilliQ water at room temperature. Cells were vortexed  
585 vigorously for 20 min and then 110µl of sterile 10X PBS were added. Samples were clarified  
586 by centrifugation 2 min at 14000 rpm. The supernatants containing intracellular particles and  
587 RNAs were collected and stored at -80°C until analysis.

588

#### 589 **HEV RNAs extraction and quantification**

590 Supernatants collected at 2, 6 and 10 d.p.e and intracellular viral particles produced in wt and  
591 mt PLC3/HEV-p6 cells were submitted to viral RNAs extraction. HEV RNA levels were  
592 quantified by RT-qPCR, as described previously (33, 34).

593

594

595

596 **Infectious titers**

597 Huh 7.5 cells ( $3 \times 10^3$ ) seeded in 96-well plates the day before were infected with serial  
598 dilutions of supernatants or intracellular viral particles from wt and mt PLC3/HEV-p6 cells.  
599 Three days post-infection, cells were fixed and processed for indirect immunofluorescence.  
600 Cells labeled with anti-ORF2 antibody 1E6 were counted as infected cells. The number of  
601 infected cells was determined for each dilution and used to define the infectious titers in focus  
602 forming unit (FFU)/ml.

603

604 **Mass spectrometry**

605 N-terminus identification of the ORF2c protein was performed as in Montpellier et al. (19).  
606 For N-glycans analyses, ORF2g/ORF2c proteins were immunoprecipitated with the 4B2 anti-  
607 ORF2 antibody and denaturated for 10min at 95°C in glycoprotein denaturing buffer (NEB).  
608 Proteins were treated or not with PNGaseF (19), as described above, and resolved by SDS-  
609 PAGE. Colloidal blue stained bands corresponding to ORF2g and ORF2c proteins in WB  
610 were cut into two slices for in-gel digestion with trypsin or AspN. NanoLC-MSMS analyses  
611 of the protein digests were performed on a UltiMate-3000 RSLCnano System coupled to a Q-  
612 Exactive instrument (Thermo Fisher Scientific). Collected raw data were processed and  
613 converted into \*.mgf peak list format with Proteome Discoverer 1.4 (Thermo Fisher  
614 Scientific). MS/MS data was interpreted using search engine Mascot (version 2.4.0, Matrix  
615 Science) with a tolerance on mass measurement of 10 ppm for precursor and 0.02 Da for  
616 fragment ions, against a composite targetdecoy database (40584 total entries) built with the  
617 sequences of ORF2 (H9E9C9\_HEV) and the PNGaseF-deglycosylated ORF2 protein in  
618 which the three N-glycosylated sites were replaced by Asp(D) residues, fused with a  
619 Swissprot homo sapiens database (TaxID=9606, 20 May 2016, 20209 entries) and a list of  
620 classical contaminants (119 entries). Carbamidomethylation of cysteine residues, oxidation of

621 methionine residues and protein N-terminal acetylation were searched as variable  
622 modifications. Up to three trypsin or Asp-N missed cleavage were allowed. Semi-specific  
623 cleavage was also authorized. Spectral counting was performed without MS score filtering.  
624 Peptides quantitation of ORF2 and PNGaseF-deglycosylated ORF2 protein was performed on  
625 MS1 level using Skyline (ver. 3.7) (35). After automated peak picking and retention time  
626 alignment of Skyline, a manual correction of wrong peak boundaries was performed and  
627 normalized total areas of peptide peaks were exported.

628

### 629 **Density gradients**

630 Supernatants of wt and mt PLC3/HEV-p6 cells were collected and concentrated 100 times  
631 with Vivaspin ultrafiltration spin columns (Sartorius). Concentrated supernatants were  
632 layered on a 7.5-40% iodixanol gradient, which was centrifuged at 160,000g for 16h at 4°C.  
633 Twelve fractions of 1ml were collected and their density was measured by refractometry.  
634 Each fraction was used for RNA quantification and immunoblotting, as described above.

635 **Acknowledgments**

636 This work was supported by the French “Agence Nationale de la Recherche sur le Sida et les  
637 hépatites virales” (ANRS). M. A. was supported by a fellowship from the ANRS. IMS was  
638 supported by PhD-grants from Ghent University and the Egyptian Government. PM was  
639 supported by an ‘Excellence of Science’ grant of the Research Foundation – Flanders (FWO-  
640 Vlaanderen) under grants n° EOS-30981113; and FWO project G0D2715N.

641 We thank Sophana Ung for his technical contribution. We thank Suzanne U. Emerson (NIH,  
642 USA) for providing us with reagents. We thank the imaging core facility of the BioImaging  
643 Center Lille-Nord de France for access to the instruments.

644

645  
646  
647

**Table 1: Mass spectrometry analyses of ORF2 N-glycosylation sites**

| Theoretical peptide sequences of non N-glycosylated or PNGaseF-deglycosylated ORF2 protein digested with Trypsin (Tryp) or AspN |      |                                                              |                                                                            | Number of MSMS spectrum for ORF2g/ORF2c |                    | Normalized total area of peptide peak for ORF2g/ORF2c |                    | N-glycosylation probability |
|---------------------------------------------------------------------------------------------------------------------------------|------|--------------------------------------------------------------|----------------------------------------------------------------------------|-----------------------------------------|--------------------|-------------------------------------------------------|--------------------|-----------------------------|
|                                                                                                                                 |      |                                                              |                                                                            | Non treated                             | Treated by PNGaseF | Non treated                                           | Treated by PNGaseF |                             |
| Site N1                                                                                                                         | Tryp | Non N-glycosylated<br>Deglycosylated by PNGaseF <sup>b</sup> | DVDSRGAIRRQY <u>N</u> LSTSP L TSSV ASGTNLVLYAAPLNPLLPLQDGTNTHIMATEASNYAQYR | ND <sup>a</sup>                         | ND                 | ND                                                    | ND                 | High                        |
|                                                                                                                                 |      |                                                              | DVDSRGAIRRQY <u>D</u> LSTSP L TSSV ASGTNLVLYAAPLNPLLPLQDGTNTHIMATEASNYAQYR | ND                                      | ND                 | ND                                                    | ND                 |                             |
|                                                                                                                                 | AspN | Non N-glycosylated<br>Deglycosylated by PNGaseF <sup>c</sup> | DVDSRGAIRRQY <u>N</u> LSTSP L TSSV ASGTNLVLYAAPLNPLLPLQ                    | ND                                      | ND                 | ND                                                    | ND                 |                             |
|                                                                                                                                 |      |                                                              | DVDSRGAIRRQY                                                               | ND                                      | 2/2                | 0.0/0.0%                                              | 0.5/1.2%           |                             |
| Site N2                                                                                                                         | Tryp | Non N-glycosylated<br>Deglycosylated by PNGaseF              | DFALELEFR <u>N</u> LTPGNTNT                                                | 9/6                                     | 9/8                | 6.8/4.6%                                              | 5.7/4.1%           | Low                         |
|                                                                                                                                 |      |                                                              | DFALELEFR <u>D</u> LTPGNTNT                                                | ND                                      | ND                 | ND                                                    | ND                 |                             |
|                                                                                                                                 | AspN | Non N-glycosylated<br>Deglycosylated by PNGaseF              | DFALELEFR <u>N</u> LTPGNTNTRVSRYTSTAQHRLRRGA                               | ND                                      | ND                 | ND                                                    | ND                 |                             |
|                                                                                                                                 |      |                                                              | DFALELEFR                                                                  | 2/2                                     | 6/6                | 0.1/0.2%                                              | 2.4/2.3%           |                             |
| Site N3                                                                                                                         | Tryp | Non N-glycosylated<br>Deglycosylated by PNGaseF              | EAGTTRAGYPYNY <u>N</u> TTASDQILIENAAGHR                                    | ND                                      | ND                 | ND                                                    | ND                 | High                        |
|                                                                                                                                 |      |                                                              | EAGTTRAGYPYNY <u>D</u> TTASDQILIENAAGHR                                    | ND                                      | 13/8               | 0.1/0.0%                                              | 5.6/7.4%           |                             |
|                                                                                                                                 | AspN | Non N-glycosylated<br>Deglycosylated by PNGaseF              | EAGTTRAGYPYNY <u>N</u> TTAS                                                | ND                                      | ND                 |                                                       |                    |                             |
|                                                                                                                                 |      |                                                              | EAGTTRAGYPYNY                                                              | ND                                      | 2/2                | 0.0/0.0%                                              | 1.1/0.8%           |                             |

648 <sup>a</sup> Not detected

649 <sup>b</sup> Upon PNGaseF treatment, the asparagine (N) residues from which the glycans have been removed are deaminated to aspartic acid (D) residues.

650 <sup>c</sup> Deamination of glycosylated N residues to D residues by PNGaseF treatment generates cleavage sites for AspN

651

652

653 **Figure legends**

654 **Figure 1: ORF2 production pathways and schematic representation of wild type and**  
655 **mutant ORF2 protein sequences.** (A) ORF2 production pathways. The ORF2 protein  
656 follows two different pathways in the host cell (i) a major non-productive pathway in which  
657 ORF2 proteins are addressed to the secretion route where they are glycosylated, matured  
658 and quickly secreted. This pathway leads to the production of the ORF2g and ORF2c proteins  
659 that are the major viral antigens present in the serum of HEV-infected patients. ORF2g and  
660 ORF2c proteins are N-glycosylated, O-glycosylated and sialylated. (ii) a productive pathway  
661 in which cytosolic ORF2i (infectious/intracellular) proteins are delivered to the virion  
662 assembly sites. The ORF2i protein is not glycosylated and is associated with infectious  
663 particles. (B) Schematic representation of wild type and mutant ORF2 protein sequences.  
664 HEV ORF2 protein is a 660 amino acid protein. The first 23 amino acids corresponding to the  
665 signal peptide are in bold. Positions of the first aa of ORF2i, ORF2g and ORF2c proteins are  
666 indicated. The three potential N-glycosylation sites are in bold (N1, N2 and N3). For each  
667 mutant, the introduced mutation(s) is/are shown. Mutations that inhibit N-glycosylation are in  
668 red whereas mutations that do not inhibit N-glycosylation are in green. The stars (\*\*\*\*\*)  
669 represent the epitope of the 1E6 anti-ORF2 antibody.

670

671 **Figure 2: Identification of the N-terminus of the ORF2c protein.** ORF2c proteins were  
672 immunoprecipitated with an anti-ORF2 antibody (4B2), denatured and incubated or not  
673 with N-succinimidyloxycarbonylmethyl tris (2,4,6-trimethoxyphenyl) phosphonium bromide  
674 (TMPP), which binds specifically to the N-terminus of intact proteins. Proteins were resolved  
675 by SDS-PAGE, digested in-gel with trypsin or AspN and analyzed by nanoLC-MS/MS. (A)  
676 Peptide covering is highlighted in grey on the sequence. Ser<sup>102</sup> in bold corresponds to the first  
677 aa of ORF2c that was identified by TMPP labeling. (B) and (C) MS/MS spectrum of N-

678 terminal peptides of the ORF2c protein. (B) Tryptic peptide obtained from TMPP-labeled  
679 ORF2c protein. (C) AspN peptide obtained from TMPP-labeled ORF2c protein. +572  
680 corresponds to the TMPP mass increment following TMPP labeling.

681

682 **Figure 3: Subcellular distribution of wt and mutant ORF2 proteins.** PLC3 cells were  
683 electroporated with wt and mt HEV-p6 RNAs and grown on coverslips. 3 days post-  
684 electroporation, cells were fixed and ORF2 protein was stained using the 1E6 antibody (in  
685 red). Nuclei were stained with DAPI (in blue). Cells were analyzed by confocal microscopy  
686 (magnification x40). Representative acquisitions of two independent experiments are  
687 presented. (A) Cells expressing wild type (wt) and N1S1 (N137A); N1S2 (S139A); N1S3  
688 (S139T) mutants. (B) Cells expressing N2S1 (N310A); N2S2 (T312A); N2S3 (T312S) and  
689 N2S4 (P313A) mutants. (C) Cells expressing N3S1 (N562A); N3S2 (T564A); N3S3 (T564S)  
690 mutants. (D) Cells expressing Gly(-) (N1S2+N3S1) and Gly (+) (N1S3+N3S3) double  
691 mutants and non-transfected PLC3 cells (CTL).

692

693 **Figure 4: Characterization of wt and mutant ORF2 proteins by western blot (WB).**  
694 Supernatants and lysates of wt and mt PLC3/HEV-p6 cells were collected at 10 days post-  
695 electroporation, normalized by protein quantification assay, and ORF2 protein was detected  
696 by WB using the 1E6 antibody. The representative results of two independent experiments are  
697 presented. Detection of ORF2 protein in cell lysates in reducing conditions (A) and in non-  
698 reducing conditions (C). Tubulin (Tub) was also detected to control protein loading.  
699 Detection of ORF2 protein in supernatants in reducing conditions (B) and in non-reducing  
700 conditions (D). Wt and mt PLC3/HEV-p6 cell lysates (E) and supernatants (F) were digested  
701 (+) or not (-) with Peptide-N-Glycosidase F (PNGaseF). (G) Supernatants of wt and mt  
702 PLC3/HEV-p6 cells were incubated for indicated times at 37°C. Relative ORF2 protein



703 amounts were measured by densitometry. Values were adjusted to 100% for time 0 day.  
704 Results are from two independent experiments.

705

706 **Figure 5: Impact of mutations of ORF2 protein N-glycosylation sites on antibody**  
707 **recognition.** (A and B) Supernatants and lysates of wt and mt PLC3/HEV-p6 cells were  
708 collected at 10 days post-electroporation. Proteins in cell lysates and supernatants were  
709 normalized by protein quantification assay on cell lysates. ORF2 proteins were  
710 immunoprecipitated (IP) by using the 1E6 linear anti-ORF2 antibody or the 4B2 and 2E2  
711 conformational anti-ORF2 antibodies, as indicated. Input of ORF2 proteins used for  
712 immunoprecipitations are shown. ORF2 proteins were detected by WB using 1E6 antibody.  
713 (C) Detection of HEV-Ag in supernatants using the Wantai HEV-Ag ELISA<sup>Plus</sup> kit. Results  
714 are presented as signal to cut-off ratios (S/CO). (D) A serum from a non-infected patient (N6)  
715 and a serum from a patient who has cleared his HEV infection (S30) were both incubated with  
716 protein A-agarose beads and then with ORF2g/ORF2c proteins (ORF2) or PBS (CTL). ORF2  
717 proteins were next detected by WB using 1E6 antibody. ORF2g/ORF2c proteins were isolated  
718 on iodixanol cushions (E) (Top) ORF2g/c proteins isolated from supernatants of wt and mt  
719 PLC3/HEV-p6 cells were immunoprecipitated with S30-immobilized beads. ORF2g/c  
720 proteins from supernatant of wt PLC3/HEV-p6 cells immunoprecipitated with N6-  
721 immobilized beads were used as a control. (Bottom) Input of ORF2g/ORF2c proteins used for  
722 immunoprecipitations are shown. Representative results of two independent experiments are  
723 shown.

724

725 **Figure 6: Impact of mutations of N-glycosylation sites on ORF2 protein nuclear**  
726 **localization.** Cytoplasmic (A) and nuclear (B) extracts from wt and mt PLC3/HEV-p6 cells  
727 were prepared with the NE-PER Nuclear and Cytoplasmic extraction Kit. ORF2i and ORF2ni

728 (nuclear ORF2i) proteins were detected by WB. LaminB1 and tubulin (Tub) were also  
729 detected to evaluate the quality of extractions. Representative results of two independent  
730 experiments are shown. (C) wt and mt PLC3/HEV-p6 cells were fixed at 3 d.p.e., and ORF2  
731 protein was stained by using the 1E6 antibody. Cells (n=50) were analysed by LSM 800  
732 confocal laser-scanning (Zeiss) using x40 oil immersion lens. The nuclear fluorescence  
733 intensity of ORF2 protein was determined using the ImageJ software.

734

735 **Figure 7: Impact of mutations of ORF2 protein N-glycosylation sites on viral assembly**  
736 **and infectivity.** (A) The level of HEV RNAs in the supernatants of wt and mt PLC3/HEV-p6  
737 cells collected at 2, 6 and 10 d.p.e. was measured by RT-qPCR (IU/ml). For each condition,  
738 values are presented as fold increase compared to RNA level measured at 2 d.p.e. Presented  
739 data are the mean of two independent experiments performed in duplicate (B) Naïve Huh.7.5  
740 cells were infected with serial dilutions of supernatants collected at 2, 6 and 10 d.p.e. At 3  
741 days post-infection, cells were fixed and ORF2 protein was detected by immunofluorescence.  
742 Focus forming Units (FFU) were determined and the results are presented as FFU/mL.  
743 Presented data are the mean of two independent experiments performed in triplicate. (C)  
744 Intracellular viral particles were extracted at 10 d.p.e. and the level of HEV RNAs was  
745 measured by RT-qPCR (IU/ml). Presented data are the mean of two independent experiments  
746 performed in duplicate. (D) An aliquot of intracellular viral particles was used to infect naïve  
747 Huh. 7.5 cells and the expression of ORF2 protein was analyzed by immunofluorescence. The  
748 Focus forming Unit (FFU) was determined and the results are presented as FFU/mL. The  
749 shown data are the mean of two independent experiments performed in triplicate.

750

751 **Figure 8: Impact of mutations of ORF2 protein N-glycosylation sites on particle density.**  
752 Concentrated wt and mt PLC3/HEV-p6 cell supernatants were layered on an iodixanol

753 gradient and ultracentrifuged. Twelve fractions were collected and their densities were  
754 measured. ORF2 expression was analyzed by WB using 1E6 antibody. HEV RNA levels in  
755 each fraction were quantified by RT-qPCR.

756

757

758 **References**

- 759 1. **Debing Y, Moradpour D, Neyts J, Gouttenoire J.** 2016. Update on hepatitis E  
760 virology: Implications for clinical practice. *Journal of Hepatology* **65**:200–212.
- 761 2. **Perez-Gracia MT, Garcia M, Suay B, Mateos-Lindemann ML.** 2015. Current  
762 Knowledge on Hepatitis E. *JCTH* **3**:117–126.
- 763 3. **Kamar N, Izopet J, Pavio N, Aggarwal R, Labrique A, Wedemeyer H, Dalton HR.**  
764 2017. Hepatitis E virus infection. *Nat Rev Dis Primers* **3**:17086.
- 765 4. **Doceul V, Bagdassarian E, Demange A, Pavio N.** 2016. Zoonotic Hepatitis E Virus:  
766 Classification, Animal Reservoirs and Transmission Routes. *Viruses* **8**:270.
- 767 5. **Sayed IM, Vercauter A-S, Abdelwahab SF, Vercauteren K, Meuleman P.** 2015. Is  
768 hepatitis E virus an emerging problem in industrialized countries? *Hepatology*  
769 **62**:1883–1892.
- 770 6. **Takahashi M, Tanaka T, Takahashi H, Hoshino Y, Nagashima S, Jirintai, Mizuo**  
771 **H, Yazaki Y, Takagi T, Azuma M, Kusano E, Isoda N, Sugano K, Okamoto H.**  
772 2010. Hepatitis E Virus (HEV) strains in serum samples can replicate efficiently in  
773 cultured cells despite the coexistence of HEV antibodies: characterization of HEV  
774 virions in blood circulation. *J Clin Microbiol* **48**:1112–1125.
- 775 7. **Takahashi M, Yamada K, Hoshino Y, Takahashi H, Ichiyama K, Tanaka T,**  
776 **Okamoto H.** 2008. Monoclonal antibodies raised against the ORF3 protein of hepatitis  
777 E virus (HEV) can capture HEV particles in culture supernatant and serum but not  
778 those in feces. *Arch Virol* **153**:1703–1713.
- 779 8. **Qi Y, Zhang F, Zhang L, Harrison TJ, Huang W, Zhao C, Kong W, Jiang C,**  
780 **Wang Y.** 2015. Hepatitis E Virus Produced from Cell Culture Has a Lipid Envelope.  
781 *PLoS ONE* **10**:e0132503.
- 782 9. **Tam AW, Smith MM, Guerra ME, Huang CC, Bradley DW, Fry KE, Reyes GR.**  
783 1991. Hepatitis E virus (HEV): molecular cloning and sequencing of the full-length  
784 viral genome. *Virology* **185**:120–131.
- 785 10. **Koonin EV, Gorbalenya AE, Purdy MA, Rozanov MN, Reyes GR, Bradley DW.**  
786 1992. Computer-assisted assignment of functional domains in the nonstructural  
787 polyprotein of hepatitis E virus: delineation of an additional group of positive-strand  
788 RNA plant and animal viruses. *Proc Natl Acad Sci USA* **89**:8259–8263.
- 789 11. **Nimgaonkar I, Ding Q, Schwartz RE, Ploss A.** 2018. Hepatitis E virus: advances and  
790 challenges. *Nat Rev Gastroenterol Hepatol* **15**:96–110.
- 791 12. **Xu M, Behloul N, Wen J, Zhang J, Meng J.** 2016. Role of asparagine at position 562  
792 in dimerization and immunogenicity of the hepatitis E virus capsid protein. *Infect*  
793 *Genet Evol* **37**:99–107.
- 794 13. **Graff J, Zhou Y-H, Torian U, Nguyen H, St Claire M, Yu C, Purcell RH,**  
795 **Emerson SU.** 2008. Mutations within potential glycosylation sites in the capsid protein  
796 of hepatitis E virus prevent the formation of infectious virus particles. *J Virol* **82**:1185–

- 797 1194.
- 798 14. **Zafrullah M, Ozdener MH, Kumar R, Panda SK, Jameel S.** 1999. Mutational  
799 analysis of glycosylation, membrane translocation, and cell surface expression of the  
800 hepatitis E virus ORF2 protein. *J Virol* **73**:4074–4082.
- 801 15. **Jameel S, Zafrullah M, Ozdener MH, Panda SK.** 1996. Expression in animal cells  
802 and characterization of the hepatitis E virus structural proteins. *J Virol* **70**:207–216.
- 803 16. **Torresi J, Li F, Locarnini SA, Anderson DA.** 1999. Only the non-glycosylated  
804 fraction of hepatitis E virus capsid (open reading frame 2) protein is stable in  
805 mammalian cells. *J Gen Virol* **80 ( Pt 5)**:1185–1188.
- 806 17. **Jiménez de Oya N, Escribano-Romero E, Blázquez A-B, Lorenzo M, Martín-  
807 Acebes MA, Blasco R, Saiz J-C.** 2012. Characterization of hepatitis E virus  
808 recombinant ORF2 proteins expressed by vaccinia viruses. *J Virol* **86**:7880–7886.
- 809 18. **Shukla P, Nguyen HT, Faulk K, Mather K, Torian U, Engle RE, Emerson SU.**  
810 2012. Adaptation of a genotype 3 hepatitis E virus to efficient growth in cell culture  
811 depends on an inserted human gene segment acquired by recombination. *J Virol*  
812 **86**:5697–5707.
- 813 19. **Montpellier C, Wychowski C, Sayed IM, Meunier J-C, Saliou J-M, Ankavay M,  
814 Bull A, Pillez A, Abravanel F, Helle F, Brochot E, Drobecq H, Farhat R, Aliouat-  
815 Denis C-M, Haddad JG, Izopet J, Meuleman P, Goffard A, Dubuisson J,  
816 Cocquerel L.** 2018. Hepatitis E Virus Lifecycle and Identification of 3 Forms of the  
817 ORF2 Capsid Protein. *Gastroenterology* **154**:211–223.e8.
- 818 20. **Lenggenhager D, Gouttenoire J, Malehmir M, Bawohl M, Honcharova-Biletska  
819 H, Kreutzer S, Semela D, Neuweiler J, Hürlimann S, Aepli P, Fraga M, Sahli R,  
820 Terracciano L, Rubbia-Brandt L, Müllhaupt B, Sempoux C, Moradpour D,  
821 Weber A.** 2017. Visualization of hepatitis E virus RNA and proteins in the human  
822 liver. *Journal of Hepatology* **67**:471–479.
- 823 21. **Gavel Y, Heijne von G.** 1990. Sequence differences between glycosylated and non-  
824 glycosylated Asn-X-Thr/Ser acceptor sites: implications for protein engineering.  
825 *Protein Eng* **3**:433–442.
- 826 22. **Riddell MA, Li F, Anderson DA.** 2000. Identification of immunodominant and  
827 conformational epitopes in the capsid protein of hepatitis E virus by using monoclonal  
828 antibodies. *J Virol* **74**:8011–8017.
- 829 23. **Behrendt P, Bremer B, Todt D, Brown RJP, Heim A, Manns MP, Steinmann E,  
830 Wedemeyer H.** 2016. Hepatitis E Virus (HEV) ORF2 Antigen Levels Differentiate  
831 Between Acute and Chronic HEV Infection. *Journal of Infectious Diseases* **214**:361–  
832 368.
- 833 24. **Bause E.** 1983. Structural requirements of N-glycosylation of proteins. Studies with  
834 proline peptides as conformational probes. *Biochem J* **209**:331–336.
- 835 25. **Zhang S, Qu C, Wang Y, Wang W, Ma Z, Peppelenbosch MP, Pan Q.** 2018.  
836 Conservation and variation of the hepatitis E virus ORF2 capsid protein. *Gene*

- 837           **675**:157–164.
- 838   26.   **Surjit M, Jameel S, Lal SK.** 2007. Cytoplasmic localization of the ORF2 protein of  
839           hepatitis E virus is dependent on its ability to undergo retrotranslocation from the  
840           endoplasmic reticulum. *J Virol* **81**:3339–3345.
- 841   27.   **Yin X, Ying D, Lhomme S, Tang Z, Walker CM, Xia N, Zheng Z, Feng Z.** 2018.  
842           Origin, antigenicity, and function of a secreted form of ORF2 in hepatitis E virus  
843           infection. *Proc Natl Acad Sci USA* **3**:201721345–6.
- 844   28.   **Blight KJ, Mckeating JA, Rice CM.** 2002. Highly Permissive Cell Lines for  
845           Subgenomic and Genomic Hepatitis C Virus RNA Replication. *J Virol* **76**:13001–  
846           13014.
- 847   29.   **Goffard A, Callens N, Bartosch B, Wychowski C, Cosset F-L, Montpellier C,  
848           Dubuisson J.** 2005. Role of N-linked glycans in the functions of hepatitis C virus  
849           envelope glycoproteins. *J Virol* **79**:8400–8409.
- 850   30.   **McCloy RA, Rogers S, Caldon CE, Lorca T, Castro A, Burgess A.** 2014. Partial  
851           inhibition of Cdk1 in G 2phase overrides the SAC and decouples mitotic events. *Cell*  
852           *Cycle* **13**:1400–1412.
- 853   31.   **Haddad JG, Rouille Y, Hanouille X, Descamps V, Hamze M, Dabboussi F,  
854           Baumert T-F, Duverlie G, Lavie M, Dubuisson J.** 2017. Identification of Novel  
855           Functions for Hepatitis C Virus Envelope Glycoprotein E1 in Virus Entry and  
856           Assembly. *J Virol* **91**.
- 857   32.   **Emerson SU, Nguyen H, Torian U, Purcell RH.** 2006. ORF3 Protein of Hepatitis E  
858           Virus Is Not Required for Replication, Virion Assembly, or Infection of Hepatoma  
859           Cells In Vitro. *J Virol* **80**:10457–10464.
- 860   33.   **Sayed IM, Foquet L, Verhoye L, Abravanel F, Farhoudi A, Leroux-Roels G,  
861           Izopet J, Meuleman P.** 2017. Antiviral Research. *Antiviral Research* **141**:150–154.
- 862   34.   **Sayed IM, Verhoye L, Cocquerel L, Abravanel F, Foquet L, Montpellier C,  
863           Debing Y, Farhoudi A, Wychowski C, Dubuisson J, Leroux-Roels G, Neyts J,  
864           Izopet J, Michiels T, Meuleman P.** 2017. Study of hepatitis E virus infection of  
865           genotype 1 and 3 in mice with humanised liver. *Gut* **66**:920–929.
- 866   35.   **MacLean B, Tomazela DM, Shulman N, Chambers M, Finney GL, Frewen B,  
867           Kern R, Tabb DL, Liebler DC, MacCoss MJ.** 2010. Skyline: an open source  
868           document editor for creating and analyzing targeted proteomics experiments.  
869           *Bioinformatics* **26**:966–968.

870

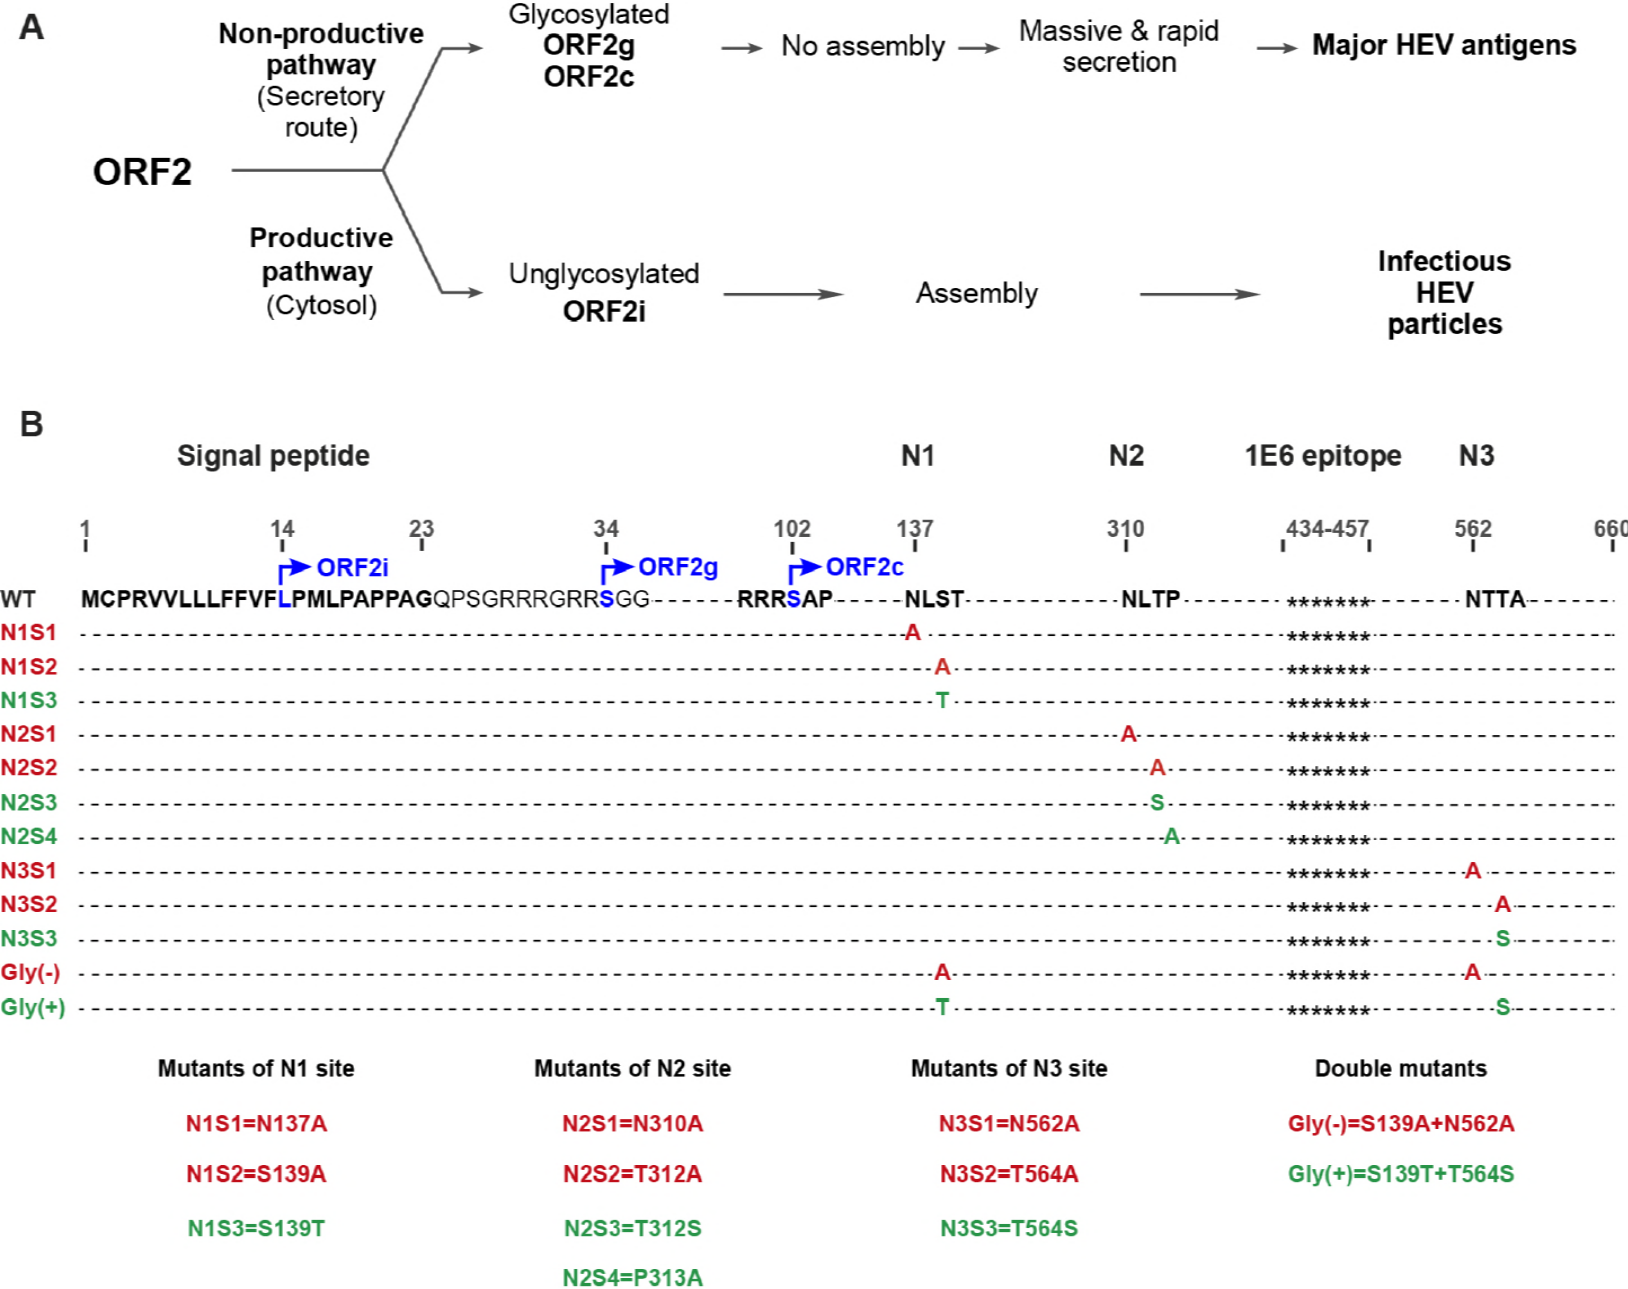

Figure 1



**A****ORF2c**

|     | Signal peptide                |            |            |            |             |            |     |
|-----|-------------------------------|------------|------------|------------|-------------|------------|-----|
| 1   | MCPRVLLLF                     | FVFLPMLPAP | PAGQPSGRRR | GRR        | GGAGGG      | FWGDRVDSQP | 50  |
| 51  | FALPYIHPTN                    | PFAADIVSQS | GAGTRPRQPP | RPLGSAWRDQ | SQRPSAAPRR  |            | 100 |
| 101 | R <sup>ORF2c</sup> SAPAGAAPL  | TAVSPAPDTA | PVPDVDSRGA | ILRRQYNLST | SPLTSSVASG  |            | 150 |
| 151 | TNLVLYAAPL                    | NPLLPLQDGT | NTHIMATEAS | NYAQYRVVRA | TIRYRPLVPN  |            | 200 |
| 201 | AVGGY <sup>ORF2c</sup> AISSIS | FWPQTTTTPT | SVDMNSITST | DVRILVQPGI | ASELVIPSER  |            | 250 |
| 251 | LHYRNQGWRS                    | VETTGVAEEE | ATSGLVMLCI | HGSPVNSYTN | TPYTGALGLL  |            | 300 |
| 301 | DFALELEFRN                    | LTPGNTNTRV | SRYTSTARHR | LRRGADGTAE | LTTTAATRFRM |            | 350 |
| 351 | KDLHFTGTNG                    | VGEVGRGIAL | TLFNLADTLL | GGLPTELISS | AGGQLFYSRP  |            | 400 |
| 401 | VVSANGEPTV                    | KLYTSVENAQ | QDKGITIPHD | IDLGDSRVVI | QDYDNQHEQD  |            | 450 |
| 451 | RPTPSPAPSR                    | PFSVLRANDV | LWLSLTAAEY | DQATYGSSTN | PMYVSDTVTF  |            | 500 |
| 501 | VNVATGAQAV                    | ARSLDWSKVT | LDGRPLTTIQ | QYSKTFYVLP | LRGKLSFWEA  |            | 550 |
| 551 | GTTRAGYPYN                    | YNTTASDQIL | IENAAGHRVA | ISTYTTSLGA | GPASISAVGV  |            | 600 |
| 601 | LAPHSALAVL                    | EDTVDYPARA | HTFDDFCPEC | RTLGLQGCAF | QSTIAELQRL  |            | 650 |
| 651 | KTEVGKTRES                    |            |            |            |             |            | 660 |

**B**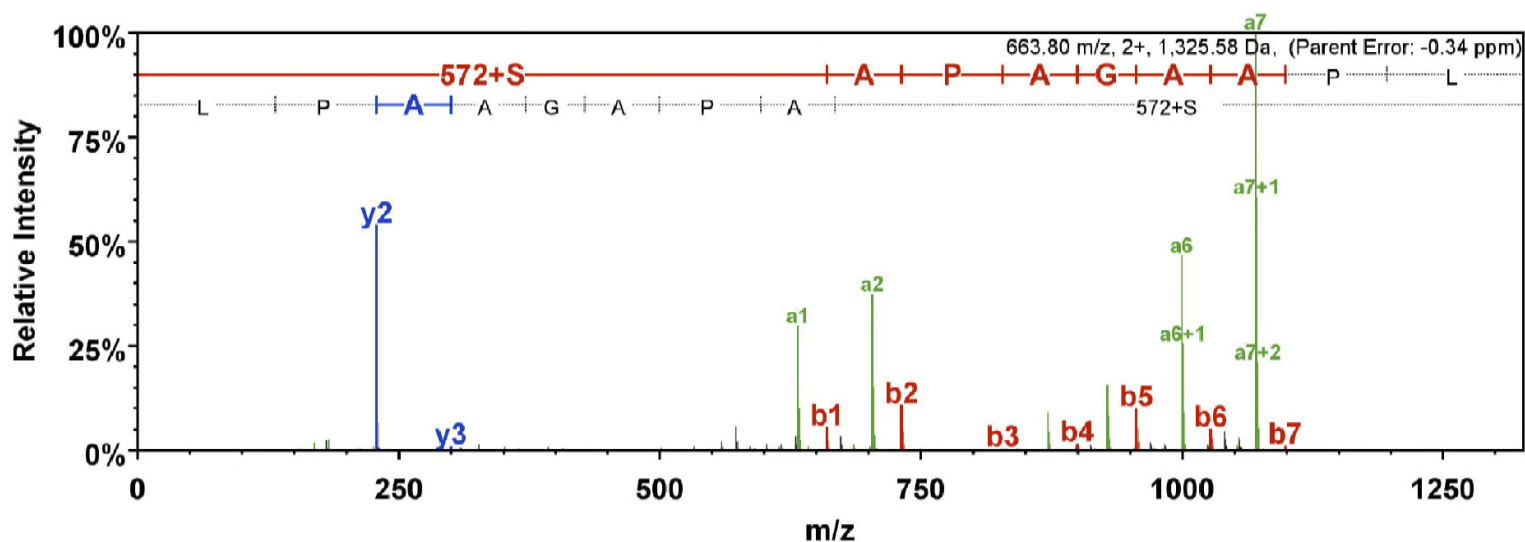**C**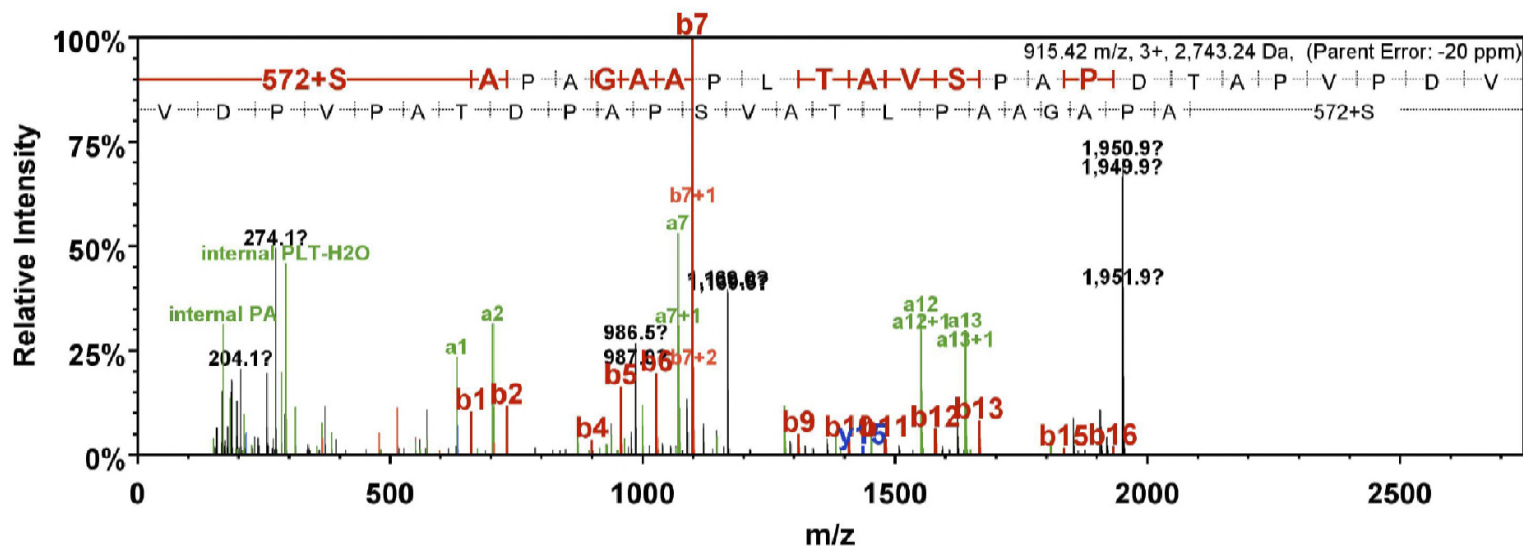

Figure 2



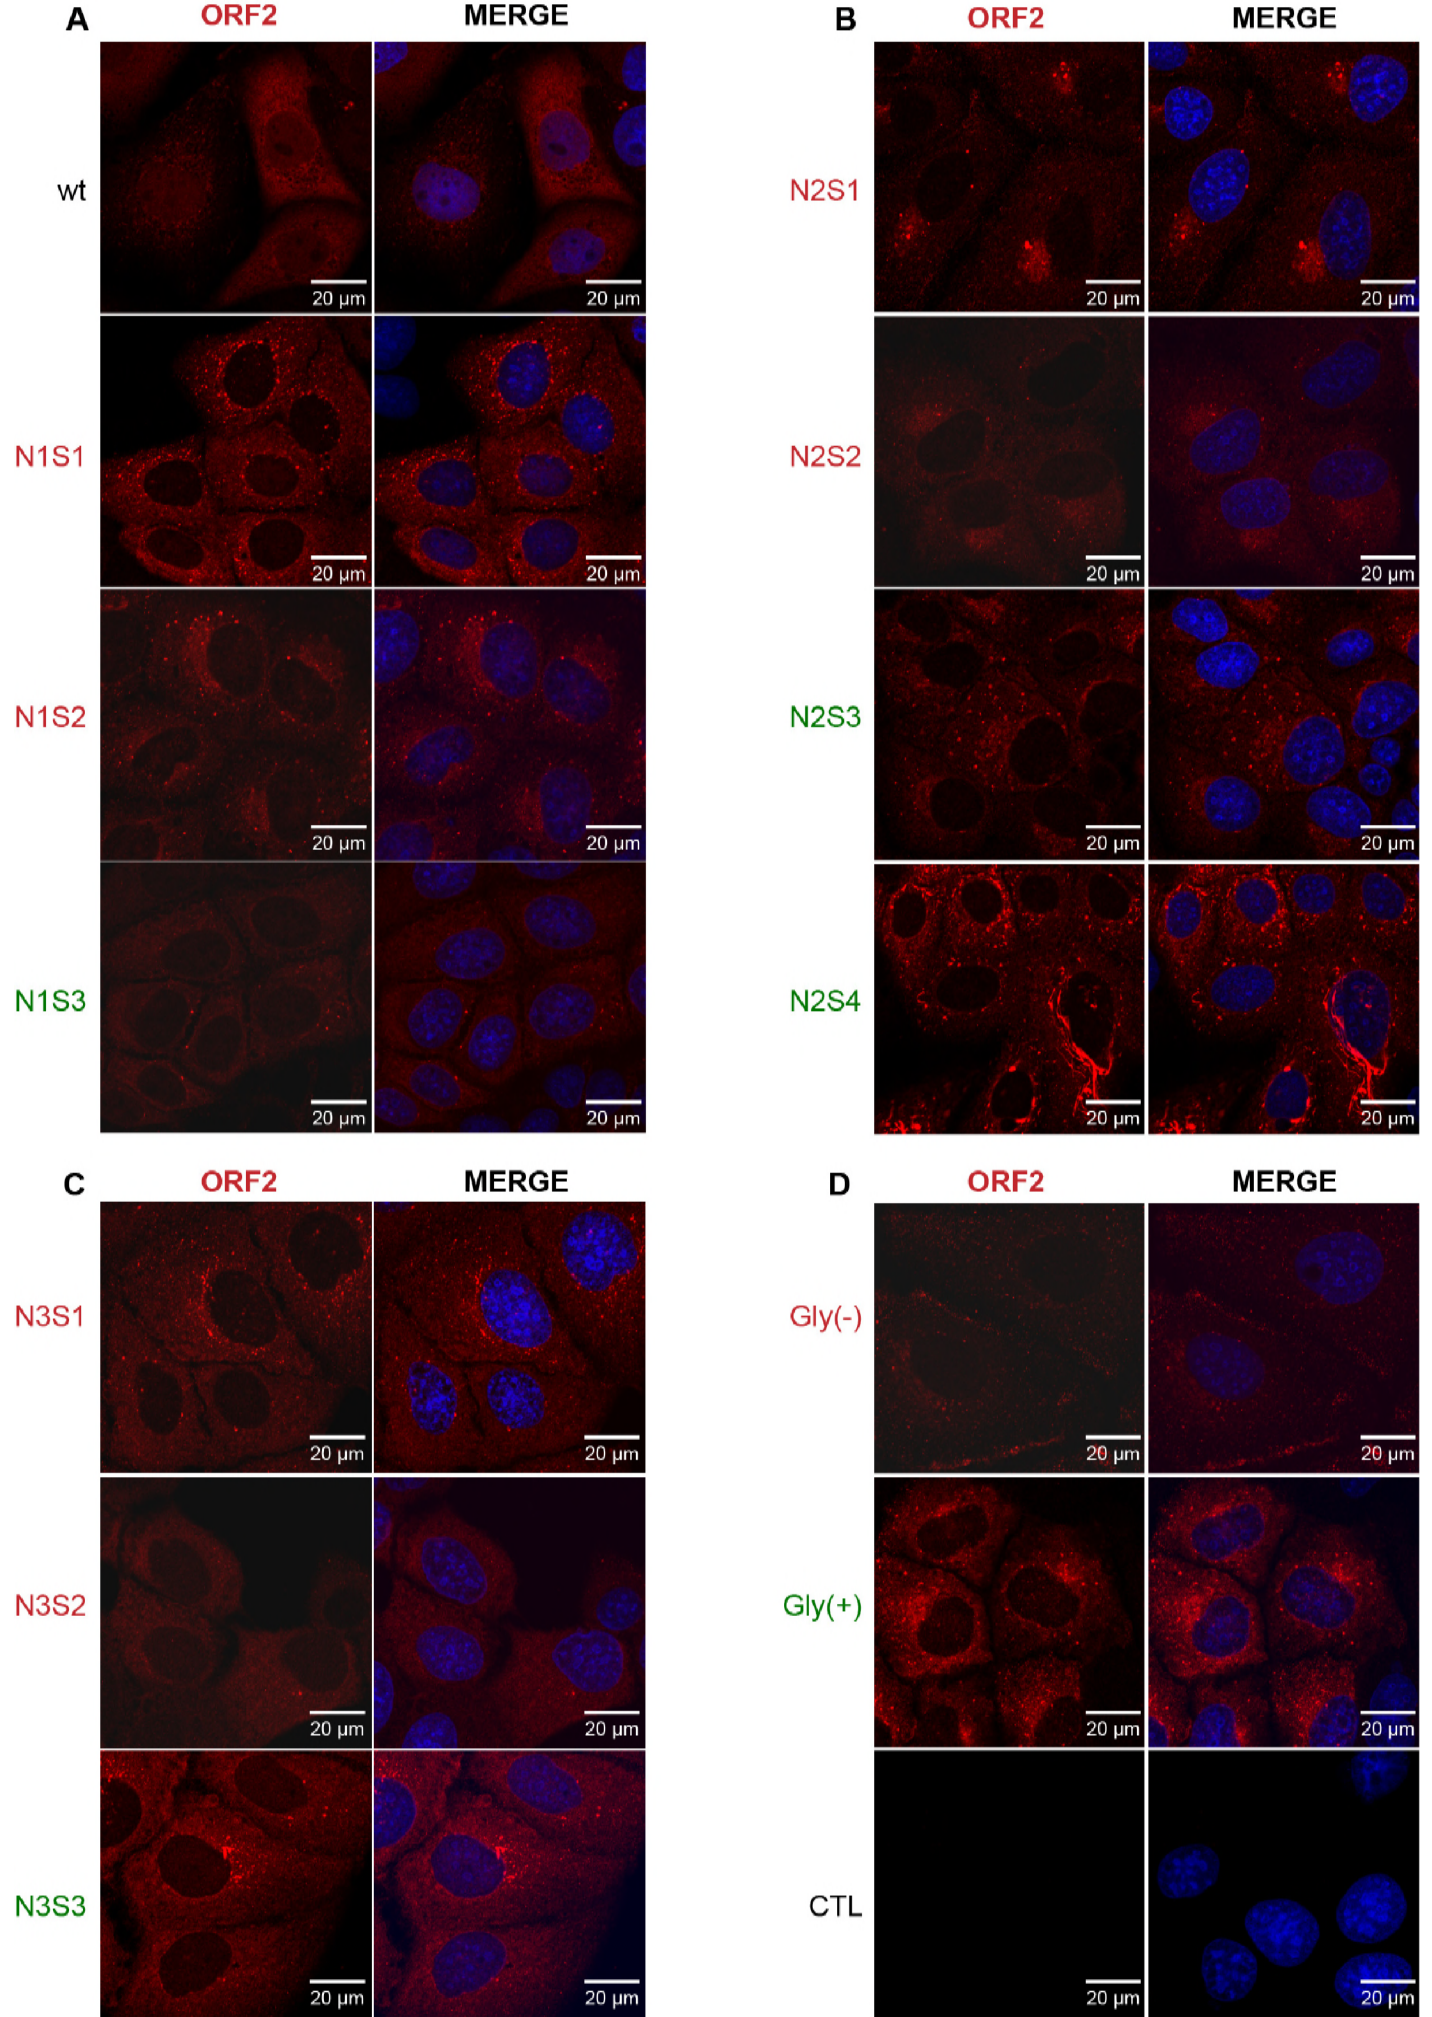

Figure 3

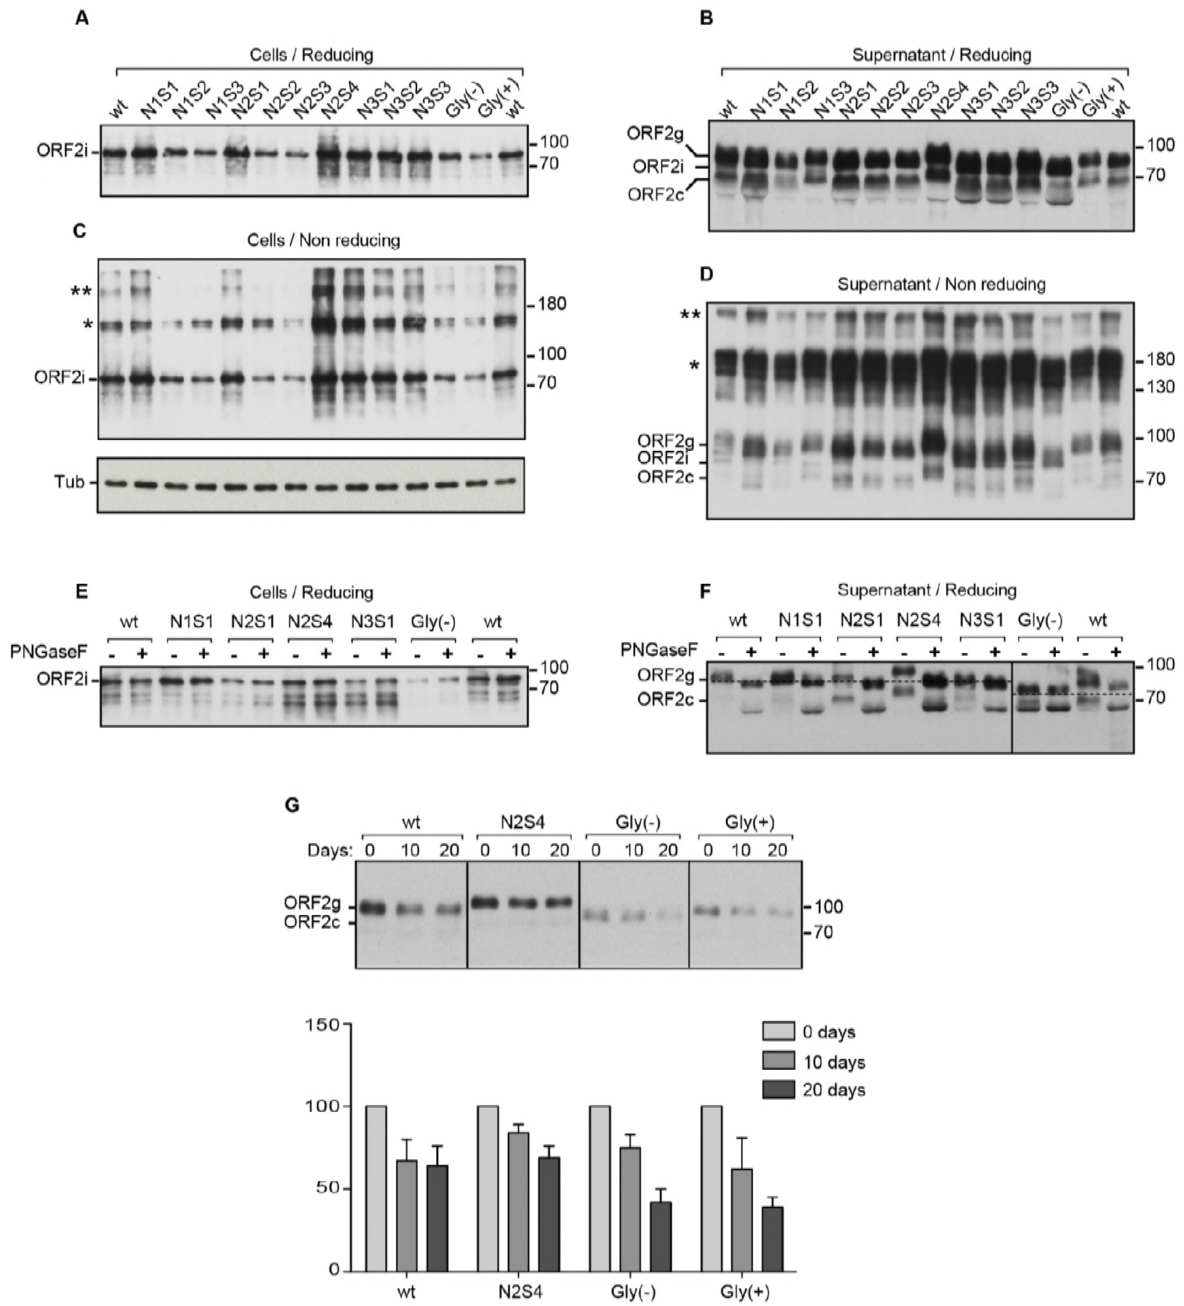

Figure 4

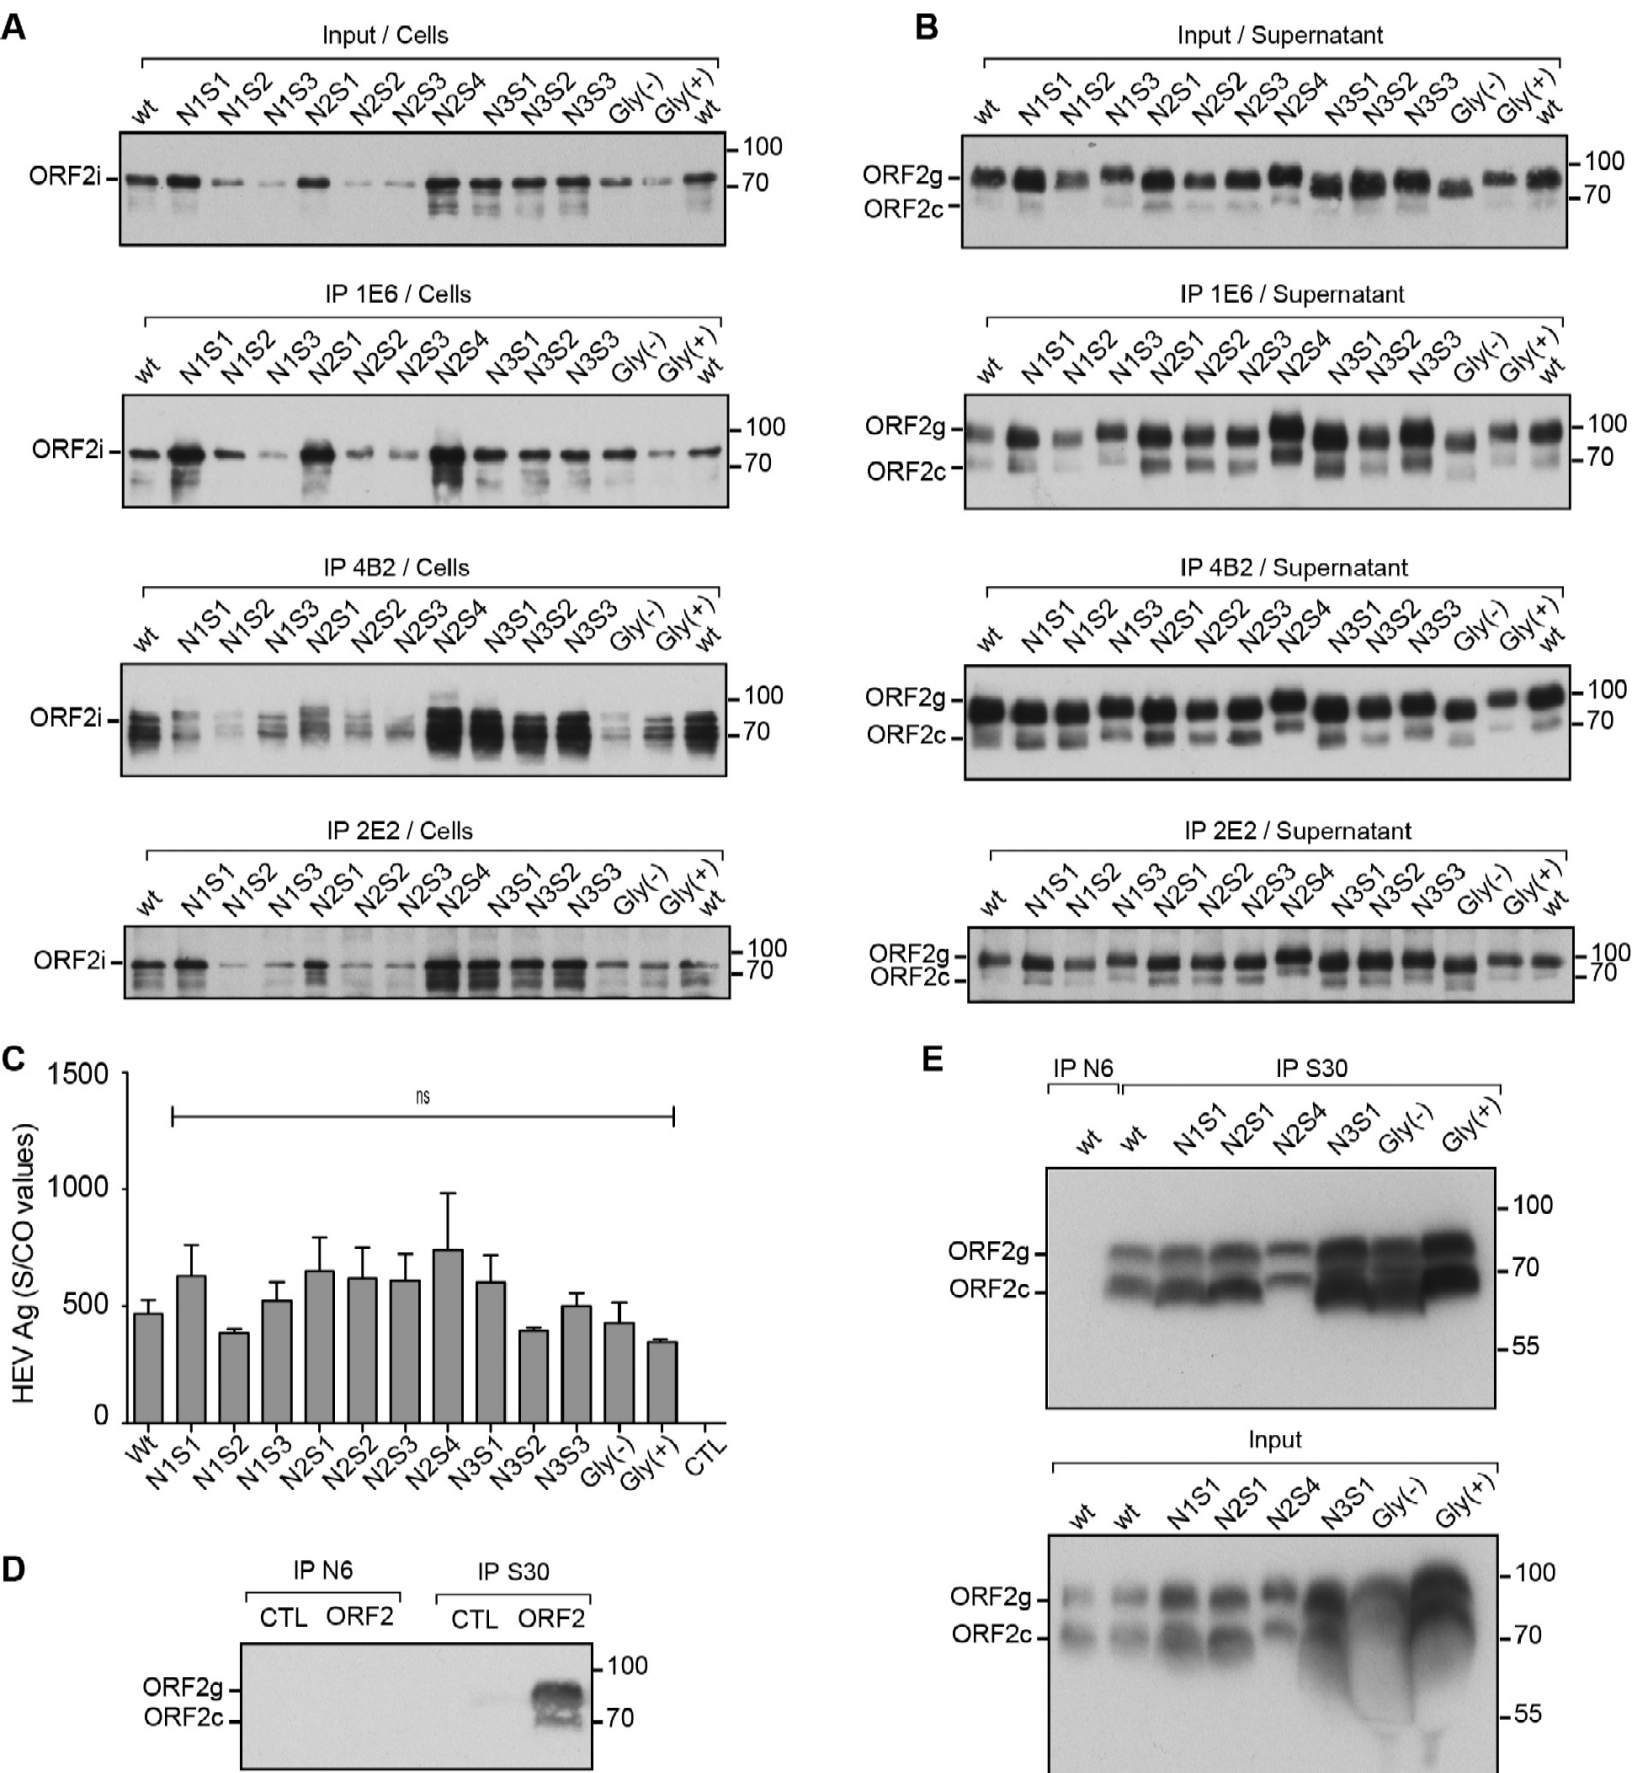

Figure 5

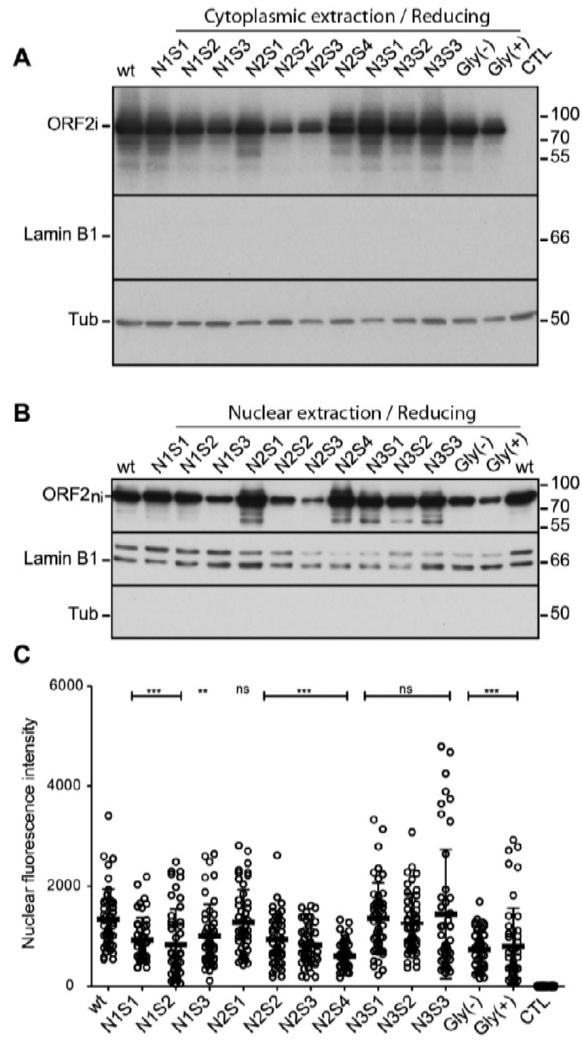

Figure 6



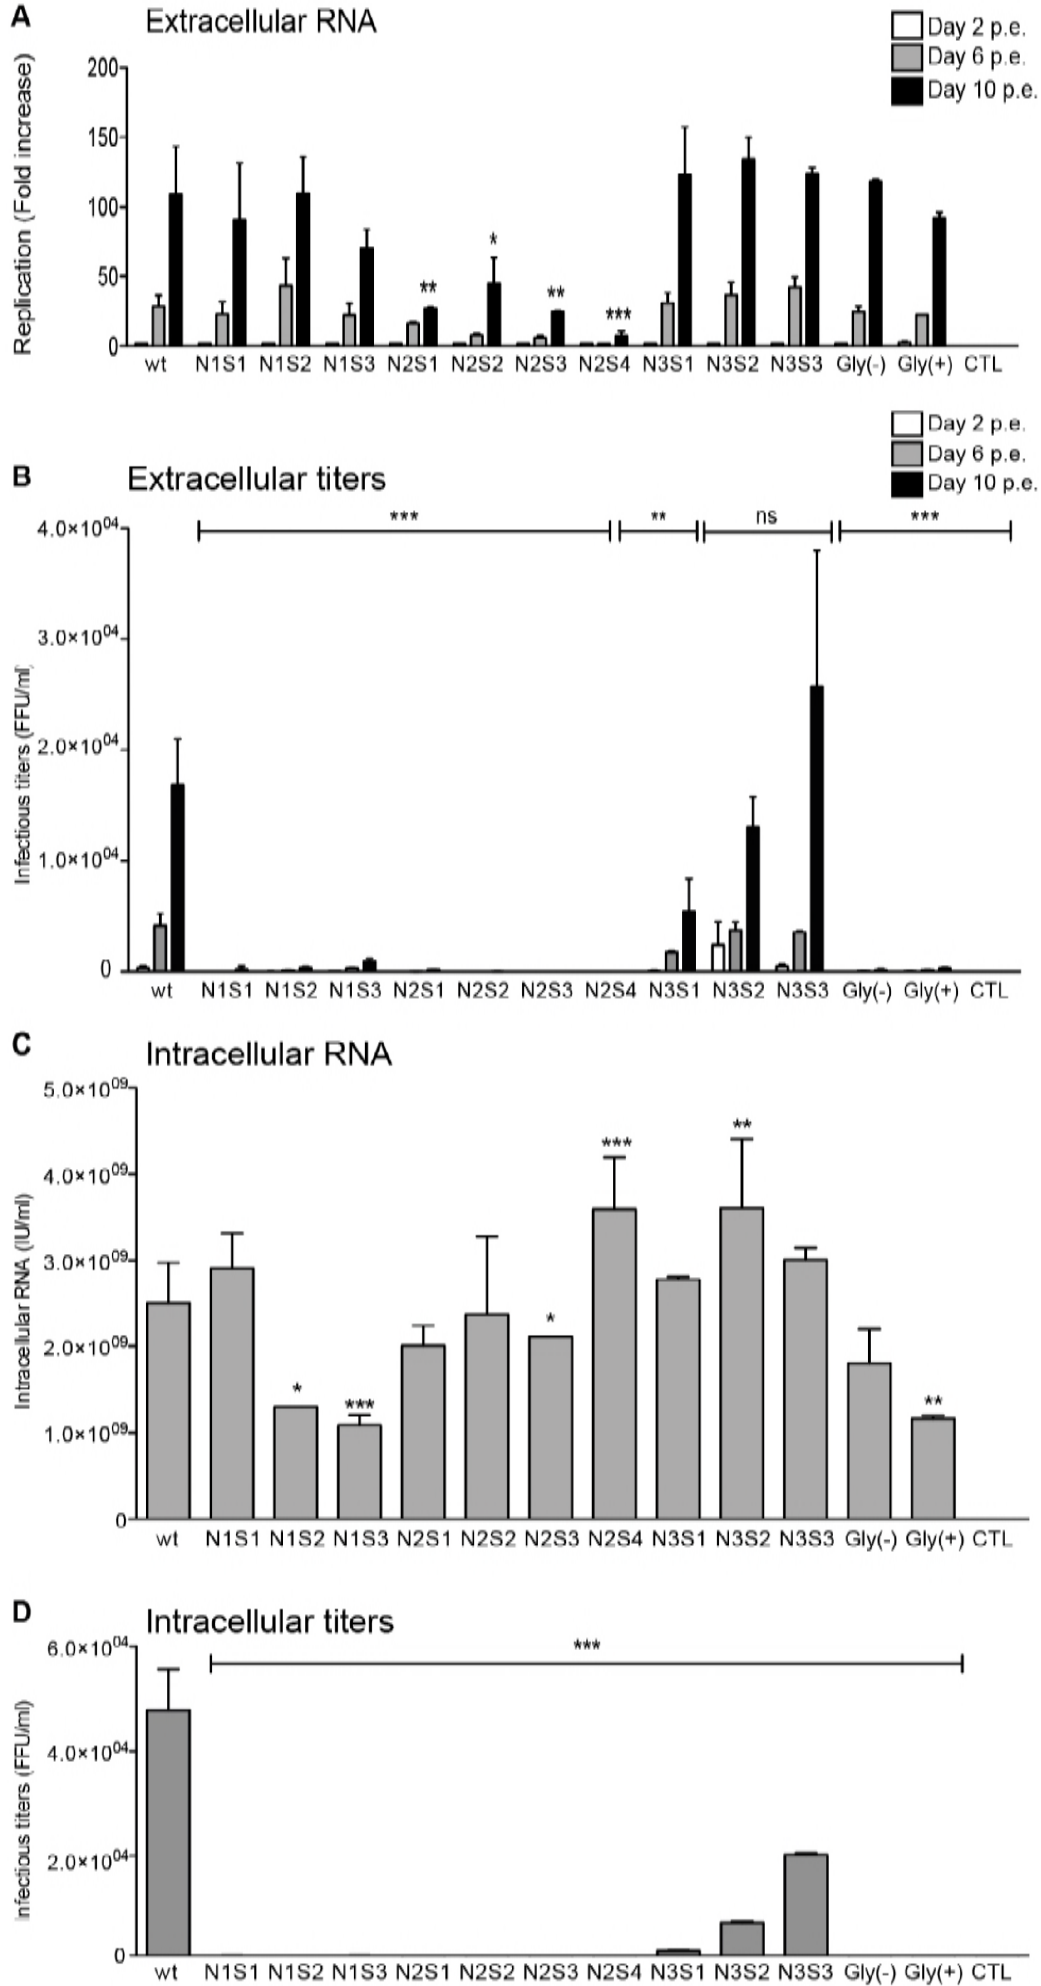

Figure 7

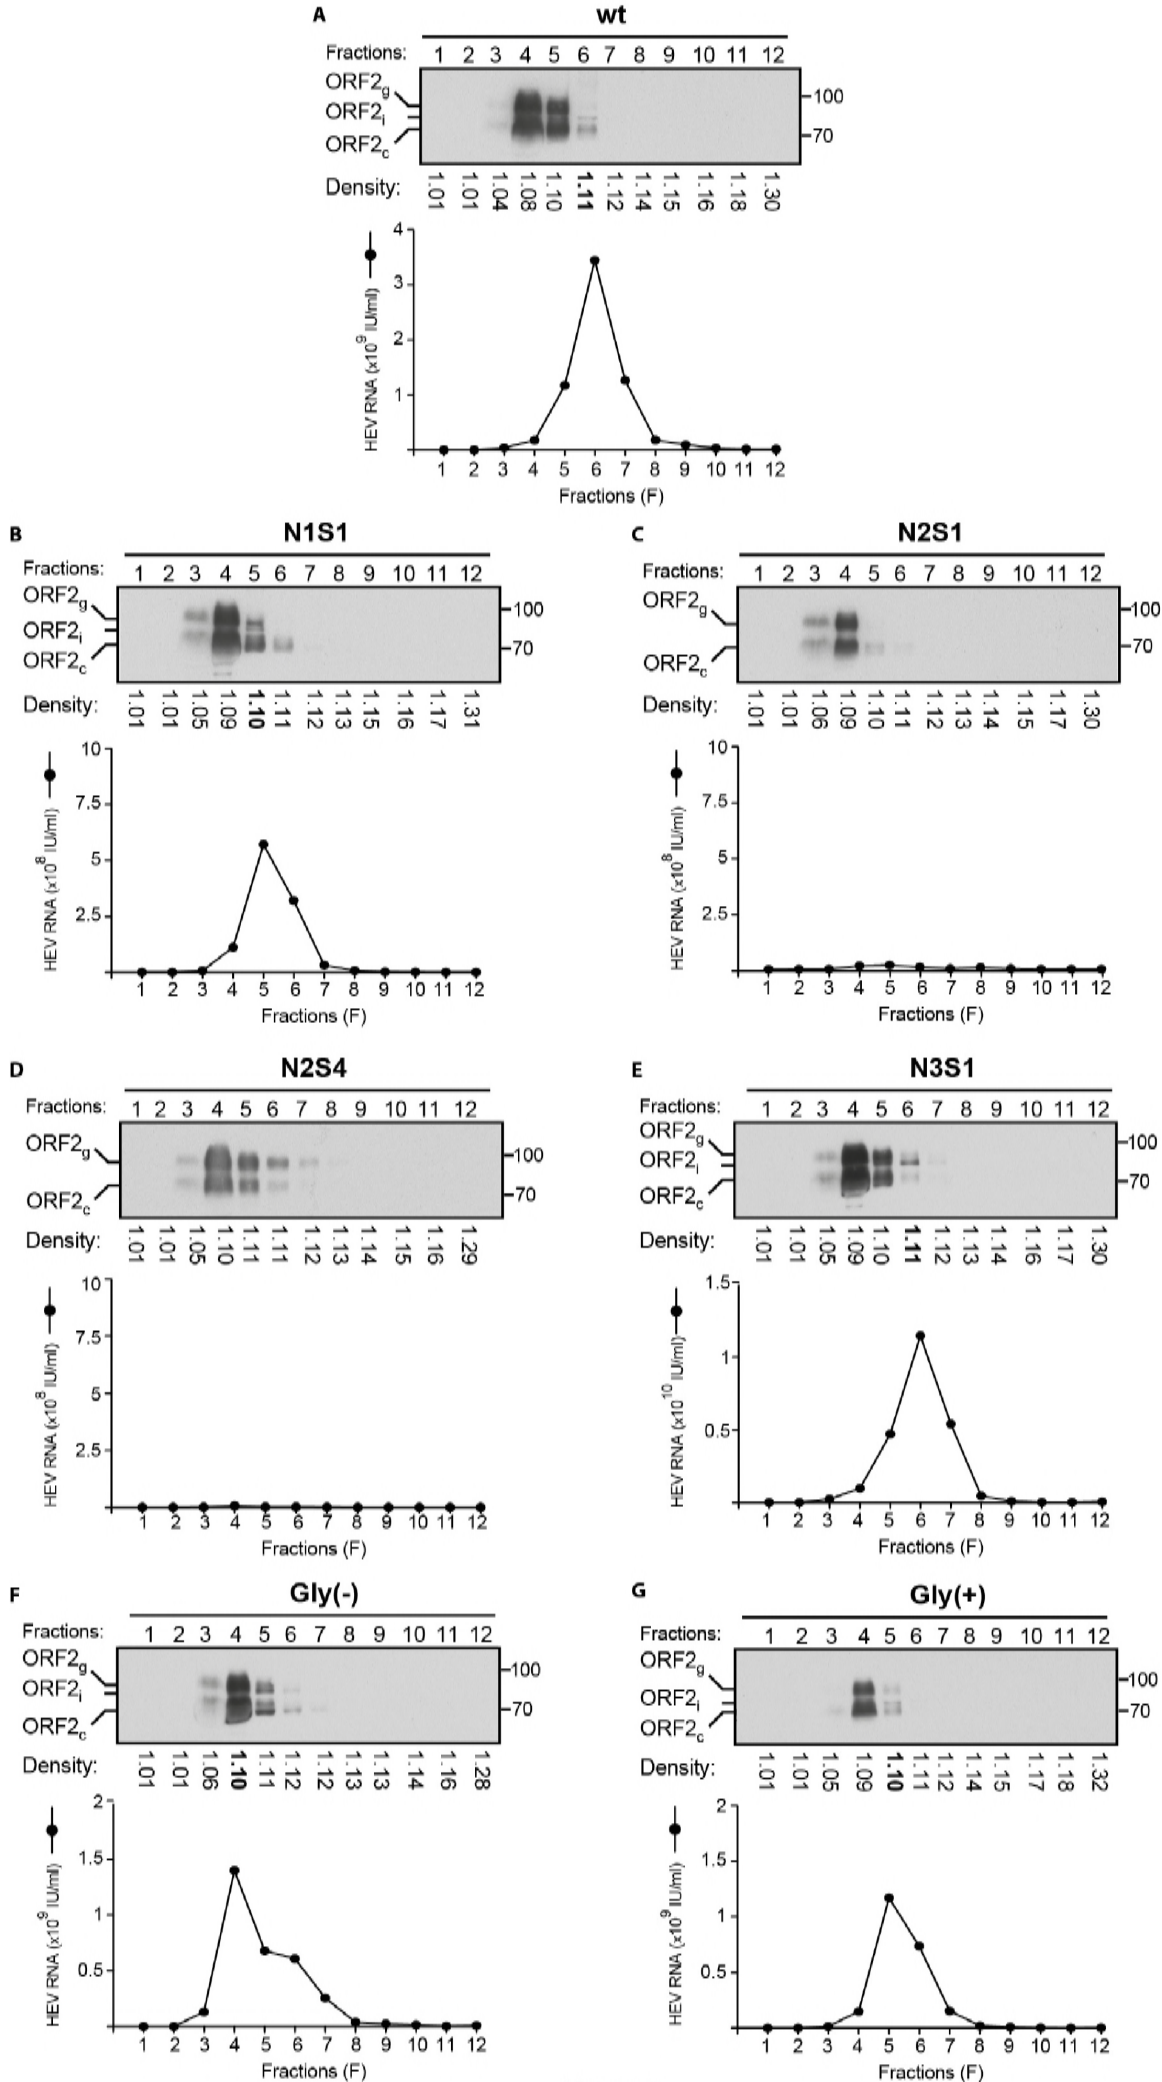

Figure 8
